# 1 Inflammation and bacteriophages affect DNA inversion states and functionality 2 of the gut microbiota

3

4 Authors:

5 Shaged Carasso<sup>1\*</sup>, Rawan Zaatry<sup>1\*</sup>, Haitham Hajjo<sup>1\*</sup>, Dana Kadosh-Kariti<sup>1\*</sup>, Nadav Ben-Assa<sup>1</sup>, Rawi  
6 Naddaf<sup>1</sup>, Noa Mandelbaum<sup>1</sup>, Sigal Pressman<sup>2,3</sup>, Yehuda Chowers<sup>2,3,4</sup>, Tal Gefen<sup>1</sup>, Kate L. Jeffrey<sup>5,6</sup>,  
7 Juan Jofre<sup>7</sup>, Michael J. Coyne<sup>8</sup>, Laurie E. Comstock<sup>8</sup>, Itai Sharon<sup>9,10</sup>, Naama Geva-Zatorsky<sup>1,11</sup>

8 Affiliations:

9 <sup>1</sup> Department of Cell Biology and Cancer Science, Rappaport Faculty of Medicine, Technion-Israel  
10 Institute of Technology, Rappaport Technion Integrated Cancer Center (RTICC), Haifa, Israel

11 <sup>2</sup> Department of Gastroenterology, Rambam Health Care Campus, Haifa, Israel

12 <sup>3</sup> Clinical Research Institute, Rambam Health Care Campus, Haifa, Israel

13 <sup>4</sup> Rappaport Faculty of Medicine, Technion-Israel Institute of Technology, Haifa, Israel

14 <sup>5</sup> Moderna, Inc., Cambridge, MA 02139, USA

15 <sup>6</sup> Center for the Study of Inflammatory Bowel Disease, Division of Gastroenterology, Department of  
16 Medicine, Massachusetts General Hospital Research Institute, Boston, MA 02114, USA; Harvard  
17 Medical School, Boston, MA 02115, USA; Program in Immunology, Harvard Medical School, Boston,  
18 MA 02115, USA.

19 <sup>7</sup> Department of Genetics, Microbiology and Statistics, School of Biology, University of Barcelona,  
20 Avda. Diagonal 643 08028 Barcelona Spain

21 <sup>8</sup> Duchossois Family Institute and Department of Microbiology, University of Chicago, Chicago, IL,  
22 USA

23 <sup>9</sup> Migal-Galilee Research Institute, P.O. Box 831, Kiryat Shmona 11016, Israel

24 <sup>10</sup> Faculty of Sciences and Technology, Tel-Hai Academic College, Upper Galilee 1220800, Israel

25 <sup>11</sup> CIFAR, MaRS Centre, West Tower 661 University Ave., Suite 505, Toronto, ON M5G 1M1, Canada

26 \* These authors contributed equally

27

## 28 Summary

29 Reversible genomic DNA-inversions control expression of numerous bacterial molecules in the human  
30 gut, but how this relates to disease remains uncertain. By analyzing metagenomic samples from six  
31 human Inflammatory Bowel Disease (IBD) cohorts combined with mice experimentation, we identified

32 multiple invertible regions in which a particular orientation was correlated with disease. These include  
33 the promoter of the anti-inflammatory polysaccharide-A (PSA) of *Bacteroides fragilis*, which is mostly  
34 oriented 'OFF' during inflammation but switches to the 'ON' orientation when inflammation is  
35 resolved. We further detected increased abundances of *B. fragilis* associated bacteriophages in  
36 patients with the PSA 'OFF' orientation. Isolation and analysis of a *B. fragilis* associated bacteriophage  
37 revealed that it induced the PSA 'OFF' switch, thereby altering the bacterial induced immune  
38 modulation. Altogether, we reveal large-scale dynamic and reversible bacterial phase variations driven  
39 both by bacteriophages and the host inflammatory state signifying bacterial functional plasticity and  
40 suggesting potential clinical interventions.

41

#### 42 **Keywords**

43 Phase variation, gut microbiome, bacteriophages, inflammatory bowel diseases, Crohn's disease,  
44 ulcerative colitis, *Bacteroides*, immunomodulation

45

#### 46 **Introduction**

47 Phase variation is the process by which bacteria undergo frequent and reversible alterations in specific  
48 loci of their genome<sup>1-4</sup>. In Bacteroidales, the dominant order of bacteria in the human gut, phase  
49 variation is highly prevalent and is largely mediated by inversions of DNA segments between inverted  
50 repeats. These inversions often involve promoter regions dictating transcription initiation of genes or  
51 operons functioning as 'ON'\OFF' switches<sup>5</sup>. In addition, DNA inversions can occur so that new genes  
52 are brought from an inactive to a transcriptionally active site by re-orientation or recombination of  
53 genomic shufflons and thus altering the expressed protein<sup>6-8</sup>. Analysis of the orientations of bacterial  
54 invertible regions in various host disease states can provide new insights into bacterial adaptation and  
55 functional contributions to the disease pathogenesis or its resolution. Phase variation in the gut  
56 Bacteroidales often modulates production of components presented on the bacterial surface<sup>9</sup>  
57 dictating which surface molecules interact, for example, with neighboring microbes or with the host.  
58 As such, phase variation confers altered functional phenotypes and bacterial functional plasticity.

59 *Bacteroides fragilis*, a common resident of the human gut, modulates its surface by the phase variable  
60 expression of its capsular polysaccharides (PS, denoted PSA-PSH). The biosynthesis loci of seven of its  
61 eight polysaccharides have invertible promoters that are orientated either 'ON' or 'OFF' in respect to  
62 the downstream PS biosynthesis operon<sup>4</sup>. Studies have shown that the *B. fragilis* polysaccharide A  
63 (PSA) modulates the host immune system by inducing regulatory T cells (Tregs) and secretion of the  
64 anti-inflammatory cytokine interleukin (IL)-10<sup>10,11</sup>. Moreover, PSA was shown to confer protection  
65 against experimental colitis<sup>10,12-14</sup>, and thus is regarded as an anti-inflammatory polysaccharide.

66 Ulcerative colitis (UC) and Crohn's disease (CD) are multifactorial inflammatory bowel diseases (IBD),  
67 characterized by a compromised mucosal barrier, inappropriate immune activation, and  
68 mislocalization of the gut microbiota<sup>15–18</sup>. Genetic, immunological, and environmental factors all  
69 contribute to the development and progression of IBD. The gut microbiota is a major environmental  
70 factor in IBD, and as such, IBD has emerged as one of the most studied microbiota-linked diseases. A  
71 mechanistic analysis of bacterial functions and potential functional alterations will allow us to better  
72 understand the role of the gut microbiota in IBD.

73 Here we present an analysis of invertible DNA orientations in the gut microbiota of IBD patients from  
74 multiple cohorts across the globe, focusing on Bacteroidales species. Our combined analysis of IBD  
75 patient metagenomes and experimental mouse models reveals alterations in multiple DNA invertible  
76 sites during gut inflammation, with the potential to modulate the host immune system. Importantly,  
77 we show that filtered fecal extracts of IBD patients alter the orientation of the PSA promoter in *B.*  
78 *fragilis* populations. We show that bacteriophages are correlated with the PSA 'OFF' state and we  
79 show that a specific lytic bacteriophage of *B. fragilis* increases the PSA promoter 'OFF' population with  
80 concurrent decline of host colonic Treg cells. These findings reveal a dynamic interplay between gut  
81 inflammation, bacteriophage, and bacterial phase variation, with potential implications for the  
82 diagnosis and treatment of IBD.

83

## 84 Results

### 85 Multiple Bacteroidales invertible DNA regions have altered orientations in association with IBD

86 As a means to determine if Bacteroidales phase variable molecules may be differentially produced in  
87 IBD patients compared to controls, we used the PhaseFinder<sup>9</sup> software to identify and quantify DNA  
88 inversions in the gut metagenomes of cohorts of IBD patients and control subjects [Table 1]. To do  
89 this, we first analyzed 39 sequenced genomes representing different human associated strains (36  
90 species) from the Bacteroidales order and identified 311 invertible regions in these genomes. Analysis  
91 of these regions in human gut metagenomes identified a total of 147 statistically significant DNA  
92 inversions associated with the disease from 25 of the reference bacterial genomes. These DNA  
93 inversions were located in both invertible promoters and intragenic regions of diverse genes, spanning  
94 from regulatory genes to outer surface molecules. Table S1 details the locations of the inverted  
95 repeats (IR) sequences and genes flanking the phase variable regions [Figure 1A]. The invertible  
96 regions whose orientations differed most significantly between IBD patients and controls were within  
97 or in proximity to SusC/SusD-like outer membrane transport systems<sup>19</sup> and capsular polysaccharides  
98 (PS) promoters [Figure 1B]. Four of the five invertible capsular polysaccharide promoters of

99 *Bacteroides thetaiotaomicron* were differentially oriented between the groups, and three of the seven  
 100 invertible PS promoters of *B. fragilis* were differentially oriented, with the anti-inflammatory PSA  
 101 promoter being the most distinct between healthy and UC patients. The PSA promoter showed a  
 102 higher percentage (71%) of reverse oriented reads (compared to its reference genome sequence) in  
 103 IBD patients, compared to 56.2% in the healthy controls [Figure 1C, 1D]. To note, In the reference  
 104 genome of *B. fragilis* NCTC9343 the promoter of PSA is in its 'ON' orientation, hence, the reverse  
 105 orientation, found in IBD patients, represents the PSA promoter's 'OFF' orientation. We further  
 106 identified differential promoter orientations in healthy and IBD cohorts for PULs and polysaccharides  
 107 promoters of *Phocaeicola dorei*, a bacteria shown to be present in healthy subjects<sup>20,21</sup> and also  
 108 correlated with disease activity in UC<sup>22</sup> [Figure 1E].

109

110 **Table 1: Cohorts of IBD patients and control subjects included in DNA inversion analysis.**

|                | N<br>(Samples<br>included<br>in the<br>analysis) | CD   | UC  | Non-<br>IBD | Country                  | Notes                                               |                   |
|----------------|--------------------------------------------------|------|-----|-------------|--------------------------|-----------------------------------------------------|-------------------|
| IBDMDB         | 1283                                             | 574  | 349 | 360         | United States            | Longitudinal                                        | ref <sup>23</sup> |
| HMP (3 phases) | 320                                              |      |     | 320         | United States            |                                                     | ref <sup>24</sup> |
| MetaHit        | 122                                              | 4    | 21  | 97          | Denmark and Spain        |                                                     | ref <sup>25</sup> |
| 1000IBD        | 331                                              | 205  | 126 |             | the Netherlands          |                                                     | ref <sup>26</sup> |
| GeversD_2014   | 50                                               | 36   |     | 14          | United States and Canada |                                                     | ref <sup>27</sup> |
| LewisJD_2015   | 303                                              | 303  |     |             | United States and Canada | Children with Crohn's Disease Longitudinal, treated | ref <sup>28</sup> |
| SUM            | 2409                                             | 1122 | 496 | 791         |                          |                                                     |                   |

111

**A**

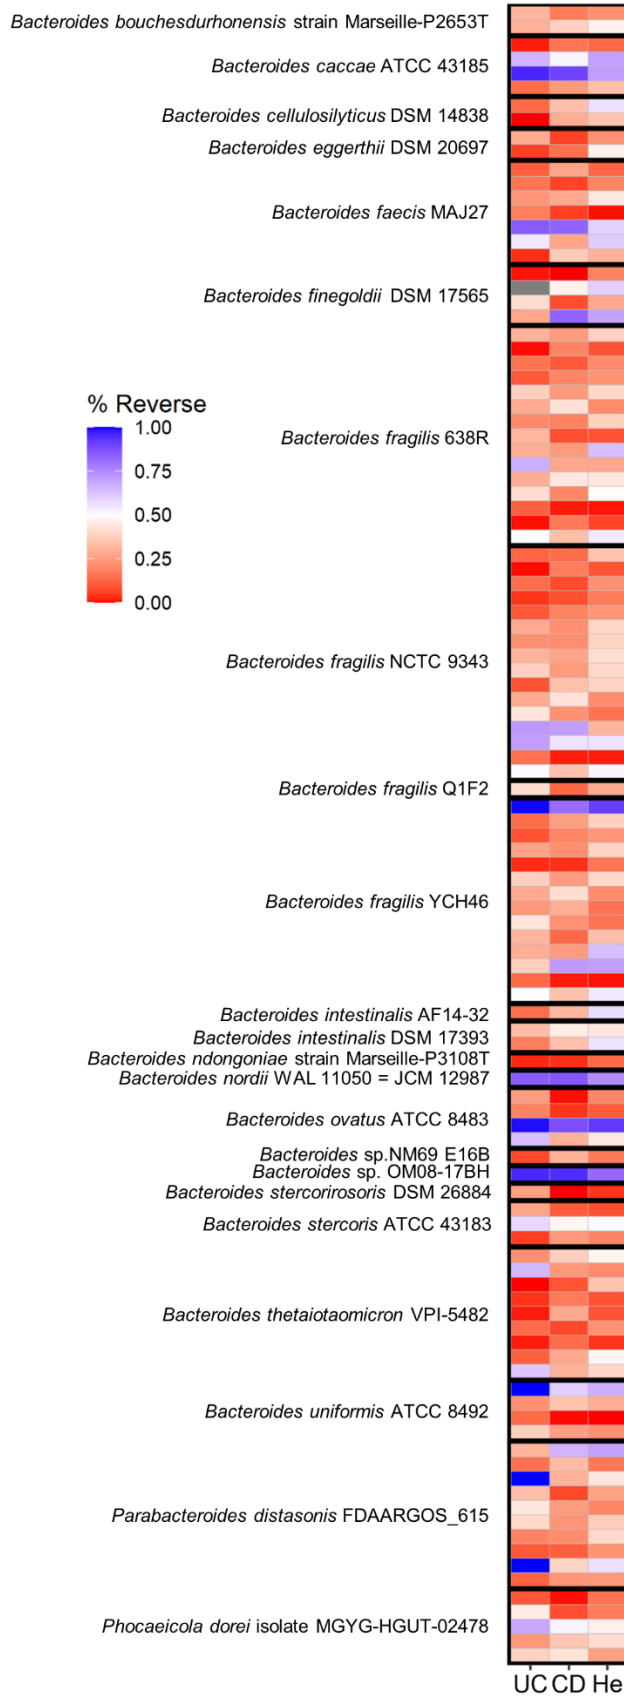

**B**

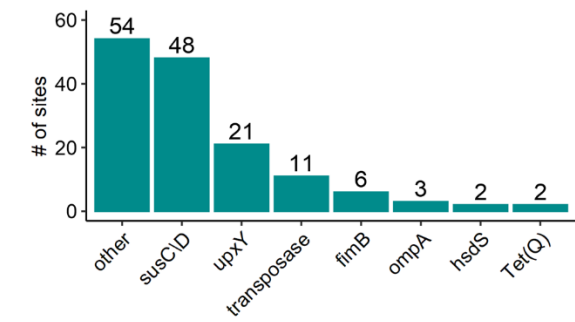

**C**

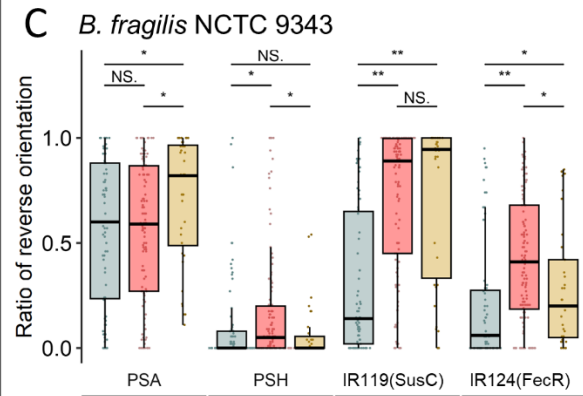

**D**

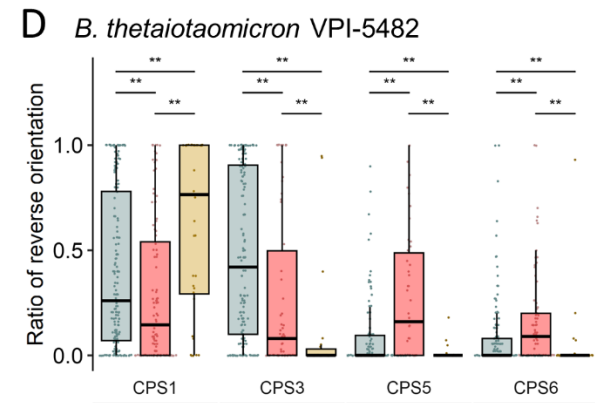

**E**

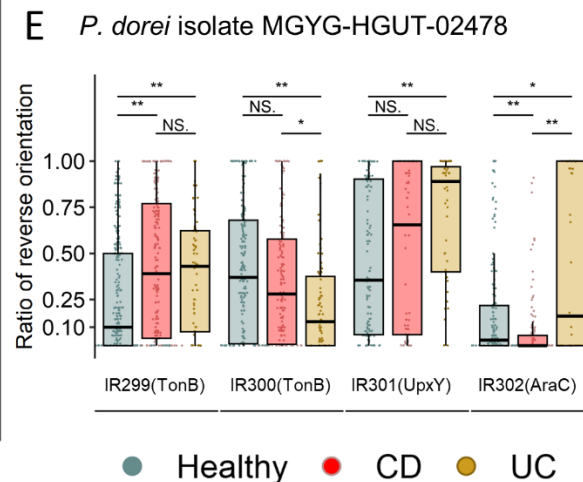

112

113

114 **Figure 1: *Bacteroides* species exhibit phase variation in health and disease.**

115 **A.** Selected significantly differentially oriented invertible DNA regions (inverted repeats (IR) segments, see **Table S1**) (Wilcoxon rank sum  
116 test, FDR  $p < 0.05$ ) in at least one comparison between Healthy, CD (Crohn's Disease) and UC (Ulcerative Colitis). Blue indicates the Forward  
117 orientation and red represents the Reverse orientation in comparison to the reference genome. **B.** Prevalence of functional genes in  
118 proximity to invertible DNA regions significantly different between healthy individuals and IBD patients. **C.** Differentially oriented invertible  
119 DNA regions, in *Bacteroides fragilis* NCTC 9343. PSA: Polysaccharide A, PSH: Polysaccharide H. **D.** Differentially oriented invertible DNA  
120 regions in *Bacteroides thetaiotaomicron* VPI-5482. CPS: Capsular Polysaccharide. **E.** Differentially oriented invertible DNA regions in  
121 *Phocaeicola dorei* MGYG-HGUT-02478. (Wilcoxon rank sum test, \* $p < 0.05$ ; \*\* $p < 0.01$ )

122 **Differential promoter orientation states are induced by inflammation in a dynamic and reversible**  
123 **manner**

124 To assess the dynamics of the *B. fragilis* PSA promoter orientation under inflammatory conditions, we  
125 designed a longitudinal experimental mouse model during which we analyzed the PSA promoter  
126 orientation over time. Germ-free (GF) mice were colonized with a healthy human microbiota, which  
127 was spiked with *B. fragilis* NCTC 9343, termed "humanized" mice. Experimental colitis was induced by  
128 adding 3% Dextran sodium sulfate (DSS) to the drinking water<sup>29</sup> [**Figure 2A**] for 9 days after which DSS  
129 was replaced with water until day 14, and as a result the inflammation was reduced. Inflammation  
130 was confirmed by the levels of Calprotectin in the stool [**Figure 2C**], a commonly used biomarker for  
131 inflammation, and with mouse weight loss [**Figure 2D**]. Stool was collected before, during and after  
132 DSS treatment to analyze orientations of specific invertible DNA regions, using quantitative PCR  
133 (qPCR). The *B. fragilis* PSA promoter orientation varied correlating with the inflammatory state [**Figure**  
134 **2B**]. At the beginning of the experiment, ~45% of the population had the promoter in the 'ON'  
135 orientation [**Figure 2B**]. Nine days after DSS was introduced, these percentages declined to 24%. By  
136 day 14, the bacterial population returned to 40% 'ON', similar to the beginning of the experiment, and  
137 to the control group, which did not receive DSS (mean of 58% of the *B. fragilis* population 'ON').

138 We further performed metagenomics analysis of these mice to study alterations in bacterial  
139 composition and to apply the PhaseFinder<sup>9</sup> algorithm for extensive phase variation analysis. This  
140 analysis revealed phase variation in multiple bacteria and genomic regions, including the PSA  
141 promoter of *B. fragilis* and the CPS3 promoter of *B. thetaiotaomicron*, overlapping with the results of  
142 the human databases analysis [**Figure 2E, 2F, Supp. Table 2**].

143 Next, we identified alterations in bacterial composition of the DSS treated mice, whereas the control  
144 mice were stable throughout. Bacterial richness (alpha-diversity, observed species) declined on day 6  
145 under inflammatory conditions [**Figure 2H**], while evenness remained constant [**Figure 2I**]. Beta-  
146 diversity (Bray-Curtis distance) was altered upon DSS treatment and each mouse had a different  
147 bacterial composition five days after removal of the DSS [**Figure 2J**]. Inflamed mice showed a decrease  
148 in bacterial abundances of *Blautia* species genera and *Eubacterium ventriosum*, while showing an  
149 increase in *Barnesiella intestinhominis* and *Alistipes dispar* [**Figure 2G, Supp. table 2 and 3**]. The

150 relative abundances of *B. fragilis* and *B. thetaiotaomicron*, which exhibited differential orientations of  
151 invertible DNA regions, increased in inflamed mice, although to a lesser extent **[Figure 2G]**.

152 To assess the role of inflammation on the orientation of the *B. fragilis* PSA promoter in the absence of  
153 a complex microbiota, we repeated the experiment using gnotobiotic mice mono-colonized with *B.*  
154 *fragilis* NCTC 9343. The PSA promoter orientation remained stable in the monocolonized mice over  
155 the course of the experiment, suggesting a role of the microbiota in the relative 'OFF' orientation of  
156 this promoter during inflammation. **[Figure 2K]**.

157

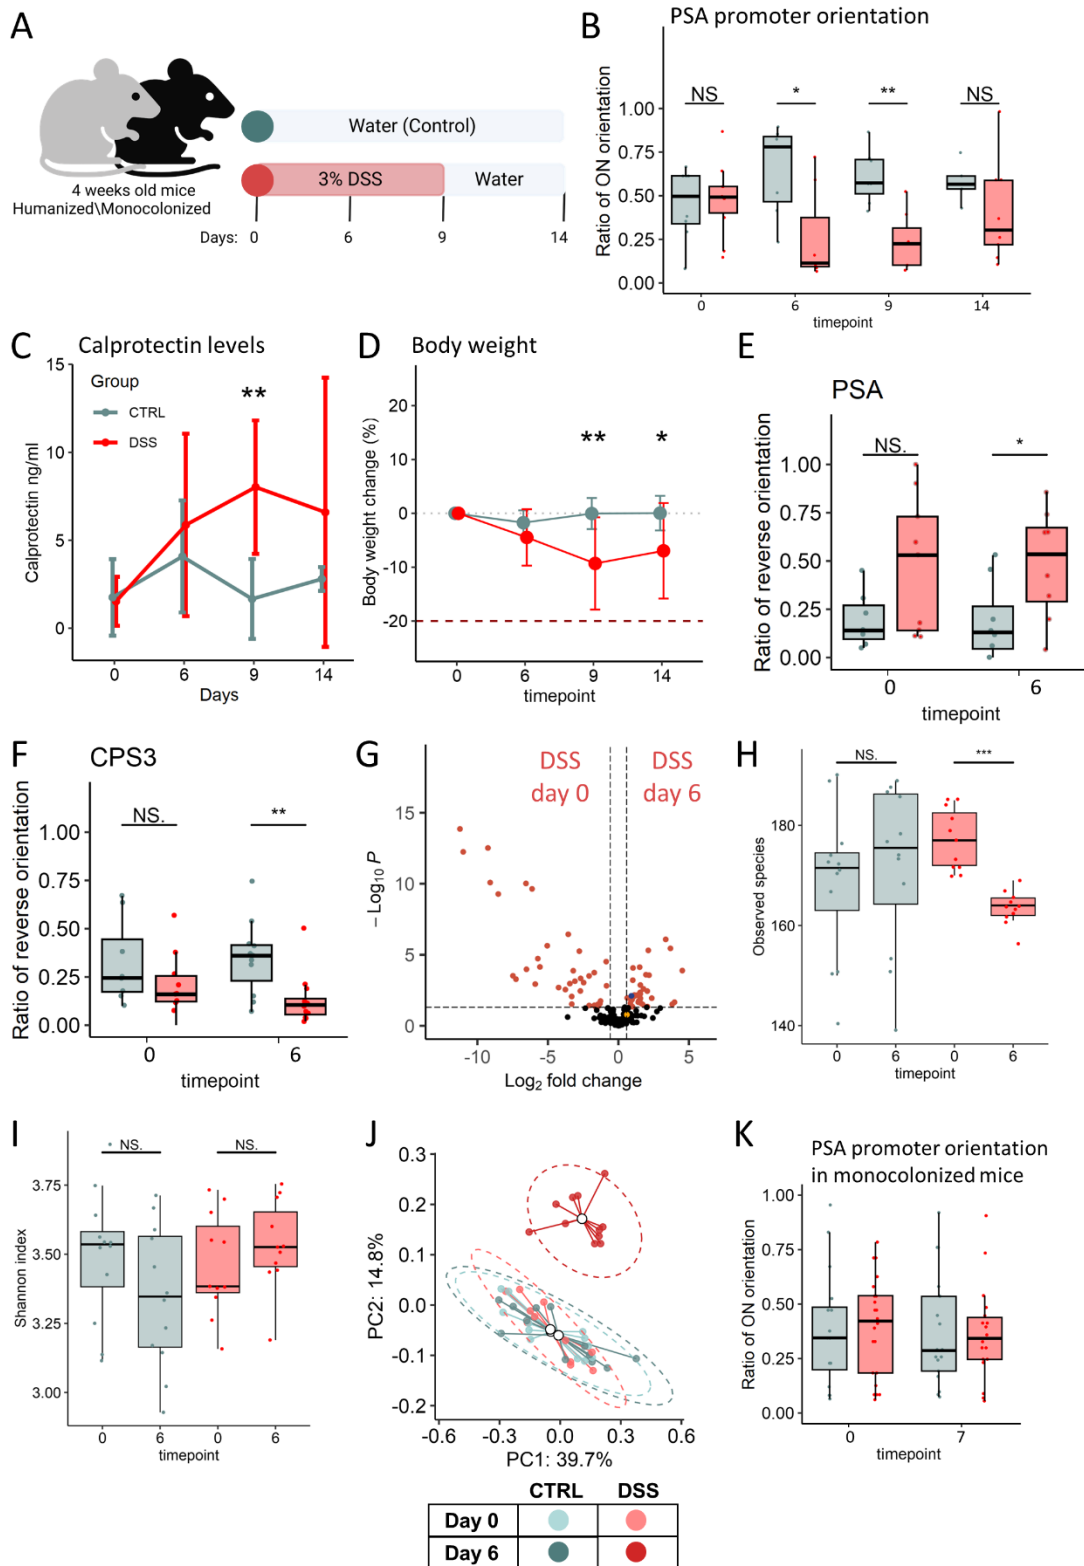

158

159 **Figure 2: Relative orientation of the PSA promoter of *B. fragilis* from the population is affected by inflamed state of the gut.**

160 **A.** Illustration of murine model of inflammation. Mice monocolonized with *B. fragilis* NCTC 9343 and mice colonized with a human microbiota  
 161 spiked with *B. fragilis* NCTC 9343 - "Humanized", were exposed to 3% Dextran sodium sulfate (DSS) (Day=0 in the illustration) at four weeks  
 162 of age; **B.** Ratio of *B. fragilis* PSA's promoter ON orientation measured by qPCR in different days of the experiment. Data represent the  
 163 median (line in box), IQR (box), and minimum/maximum (whiskers). (Wilcoxon rank sum test, \* $p < 0.05$ ; \*\* $p < 0.01$ ). Blue: Control group,  
 164 Red: DSS treated mice. **C.** Calprotectin level (ng/ml) measured in different days of the experiment. Lines represent the standard deviations.  
 165 Blue: Control group, Red: DSS treated mice. **D.** The body weight change of mice measured in different days of the experiment. Lines represent  
 166 the standard deviations. Blue: Control group, Red: DSS treated mice. **E.** Ratio of *B. fragilis* PSA's promoter reverse orientation measured by  
 167 the PhaseFinder tool, in different days of the experiment. Data represent the median (line in box), IQR (box), and minimum/maximum



168 (whiskers). (Wilcoxon rank sum test,  $*p < 0.05$ ;  $**p < 0.01$ ). Blue: Control group, Red: DSS treated mice. F. Ratio of *B. thetaiotaomicron*  
169 CPS3's promoter reverse orientation measured by the PhaseFinder tool in different days of the experiment. Data represent the median (line  
170 in box), IQR (box), and minimum/maximum (whiskers). (Wilcoxon rank sum test,  $*p < 0.05$ ;  $**p < 0.01$ ). Blue: Control group, Red: DSS treated  
171 mice. G. Differential bacterial abundance between DSS treated mice in timepoint 0 and timepoint 6 detected by the Maaslin2 algorithm.  
172 Red dots indicate differentially abundant bacteria that were determined by adjusted  $P$  value  $< 0.05$  and  $\log_2$  fold change  $>1$  and  $<-1$ ,  
173 respectively. Yellow dot indicates *B. fragilis*, and blue dot indicates *Bacteroides thetaiotaomicron*. H. Alpha diversity (observed species)  
174 between groups and timepoints. Data represent the median (line in box), IQR (box), and minimum/maximum (whiskers). (t test,  $*p < 0.05$ ;  
175  $**p < 0.01$ ,  $***p < 0.001$ ). Blue: Control group, Red: DSS treated mice. I. Alpha diversity (Shannon index) between groups and timepoints.  
176 Data represent the median (line in box), IQR (box), and minimum/maximum (whiskers). (t test,  $*p < 0.05$ ;  $**p < 0.01$ ,  $***p < 0.001$ ). Blue:  
177 Control group, Red: DSS treated mice. J. PCoA on Bray–Curtis dissimilarity distances between groups and timepoints. Each point represents  
178 a single sample, colored according to group and timepoints: light blue: Control at timepoint 0, blue: control at timepoint 6, light red: DSS  
179 treated at timepoint 0, red: DSS treated at timepoint 6. The mean (centroid) of samples in each group is indicated with a blank circle. Ellipses  
180 represent 0.95 confidence interval of each group. K. Ratio of *B. fragilis* PSA's promoter ON orientation measured by qPCR in different days  
181 in monocolonized mice. Data represent the median (line in box), IQR (box), and minimum/maximum (whiskers). (Wilcoxon rank sum test,  
182  $*p < 0.05$ ;  $**p < 0.01$ ). Blue: Control group, Red: DSS treated mice.

183  
184

### 185 **The inflammatory milieu triggers DNA inversions in *B. fragilis***

186 We next sought to examine environmental factors of inflammation that result in a decreased  
187 percentage of the *B. fragilis* population with the PSA promoter orientated ON. To do so, we exposed  
188 *B. fragilis* NCTC 9343 to fecal filtrates from IBD patients. CD and UC patients were recruited from the  
189 Rambam Health Care Campus (RHCC). Fecal samples were collected before and after Infliximab (HR)  
190 or Humira (HuR) therapy, both are antibodies targeted against tumor necrosis factor- $\alpha$  (TNF- $\alpha$ ), an  
191 inflammatory cytokine increased in IBD patients. *B. fragilis* NCTC 9343 was cultured in fecal filtrates  
192 until reaching mid-log phase, and subsequently DNA was extracted for qPCR analysis [Figure 3A]. *B.*  
193 *fragilis* exposed to fecal filtrates of patients before treatment, during inflammation, showed higher  
194 ratios of the population with the PSA promoter oriented 'OFF', while *B. fragilis* exposed to fecal  
195 filtrates after treatment showed higher ratios of the PSA promoter 'ON' orientation [Figure 3B]. This  
196 observation was in line with the fecal Calprotectin concentrations, which were reversely correlated  
197 with PSA promoter 'ON' orientation [Figure 3C]. These results demonstrated that the population of  
198 bacteria with the PSA promoter in each orientation vary in the inflamed and non-inflamed gut, with a  
199 higher percentage of the population in the 'OFF' orientation under inflammatory conditions, and a  
200 shift towards the 'ON' orientation following reduction in inflammation [Figure 3B, 3C]. This change  
201 could be due to alterations of the inversion under these conditions or due to selection of a preferred  
202 promoter state.

203

### 204 **Investigating viral associations to orientation of the polysaccharide A promoter of *B. fragilis***

205 The fecal filtrates contain a mixture of bacterial and host metabolites, cytokines, antibodies, viruses,  
206 bacteriophages, and other components. Bacteriophages have been observed to induce phase  
207 variation in bacterial cells, leading to the switching 'OFF' of specific polysaccharides loci or increased

208 expression of alternative polysaccharides with possible protective effects<sup>30</sup>. Moreover, they have been  
209 shown to be associated with intestinal inflammation and IBD in several studies<sup>31,32</sup>, including  
210 Nishiyama et al.<sup>33</sup> who characterized temperate bacteriophages and their bacterial hosts in the  
211 IBDMDB metagenomics database. Here, using phage sequences from IBDMDB database, and  
212 compared the relative abundances of these phages between samples that displayed lower (<40%) or  
213 higher (>60%) ratios of the PSA promoter 'ON' orientation. Differential abundance analysis revealed  
214 that more bacteriophages were correlated with the PSA 'OFF' orientation (**Figure 3D, Supp. Table 3**),  
215 three of which were predicted to infect *B. fragilis*<sup>33</sup>. To assess whether the relative abundances of the  
216 bacteriophages were accompanied with lower relative abundances of *B. fragilis*, we compared phage  
217 to host for each *B. fragilis* associated bacteriophage. The two viral OTUs with the highest phage to  
218 host ratios in patients, OTUs 0791 and 0820, were also correlated with low ratios of the PSA promoter  
219 'ON' orientation (i.e., with the PSA promoter 'OFF' orientation) [**Figure 3E, 3F**]. Intriguingly, viral OTUs  
220 0791 and 0820 were found to be more abundant in active CD and UC<sup>33</sup>.

221 We conducted the same analysis comparing samples with high to low 'ON' orientation ratios of the  
222 CPS3 promoter of *B. thetaiotaomicron*. Although there were differences in the virome compositions  
223 between these groups, no *B. thetaiotaomicron* associated bacteriophages were correlated with the  
224 'OFF' orientation of the CPS3 promoter (i.e., the orientation, which we identified as associated with  
225 the disease) [**Figure 3G, Supp. Table 3**]. We found three *B. thetaiotaomicron* associated viral OTUs -  
226 0165, 1130, and 1490, slightly associated with the 'ON' orientation of the CPS3 promoter (the  
227 orientation that we identified as associated with healthy controls) [**Figure 3G**]. In addition, these  
228 bacteriophages displayed low phage to host ratios [**Figure 3E**]. To note, these OTUs were not  
229 previously associated with disease<sup>33</sup>.

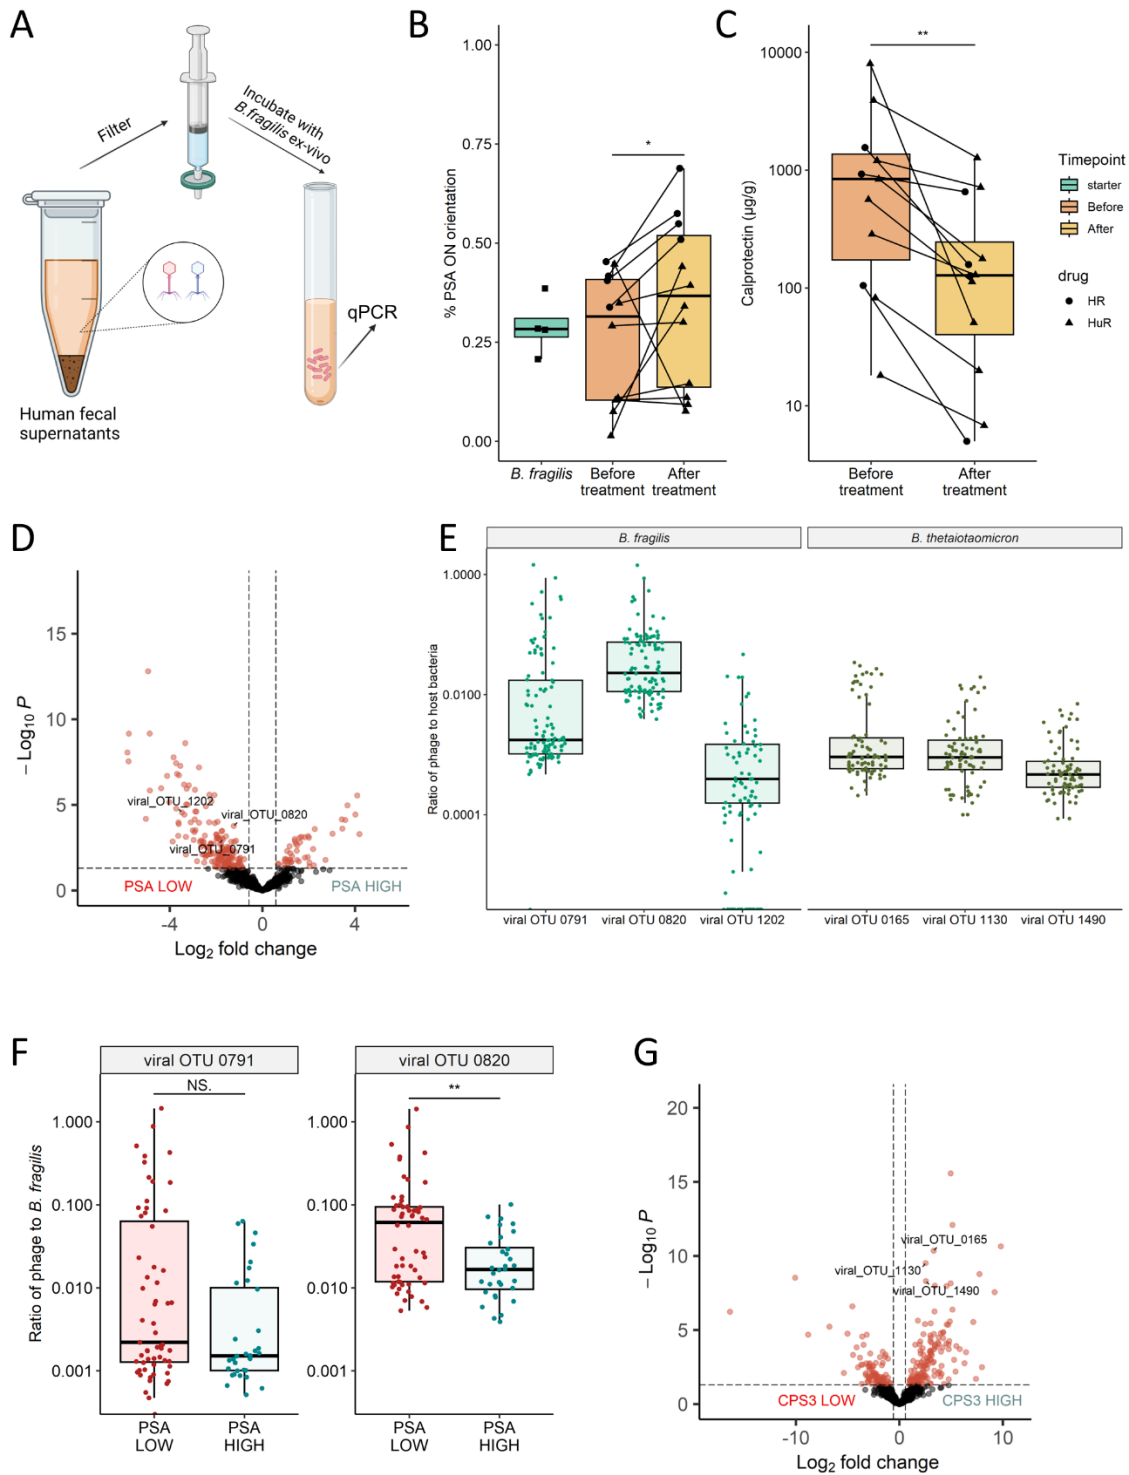

230

231 **Figure 3: Evidence of viral association to *B. fragilis* Polysaccharide A's promoter genomic orientation.**

232 **A.** Experimental design of culturing *B. fragilis* in patient's fecal filtrates. **B.** Ratio of the ON orientation of the PSA promoter of *B. fragilis*,  
 233 measured by qPCR, after ex-vivo exposure to fecal filtrates of CD patients before and after treatment with anti-TNF (either Infliximab (HR)  
 234 or Humira (HuR)). Data represent the median (line in box), IQR (box), and minimum/maximum (whiskers). (One-sided Wilcoxon rank sum  
 235 test,  $*p < 0.05$ ). green: *B. fragilis* not exposed to fecal filtrates, orange: *B. fragilis* exposed to fecal filtrates of patients before anti-TNF  
 236 treatment, yellow: *B. fragilis* exposed to fecal filtrates of patients after treatment. Dots represent individual experiments; lines connect  
 237 experiments from the same patient; Shapes are determined by the patients' treatments, circle: HR, triangle: HuR. **C.** Calprotectin levels  
 238 ( $\mu\text{g/g}$ ) measured in patients' feces. Data represent the median (line in box), IQR (box), and minimum/maximum (whiskers). (One-sided  
 239 Wilcoxon rank sum test,  $*p < 0.05$ ). Dots represent samples; lines connect samples from the same patient; Shapes are determined by the  
 240 patients' treatments, circle: HR, triangle: HuR. **D.** Differential viral taxonomic units' abundance, (from the IBDMDB cohort, count table from  
 241 Nishiyama et al. (2020).), between samples with low ON orientation of the PSA promoter (<40%) and high ON orientation (>60%), in the  
 242 IBDMDB cohort count table. Differentially abundant viral taxonomic units were detected by the DeSeq2 algorithm (Wald test,  $p < 0.01$ ). Red  
 243 dots indicate differentially abundant bacteria that were determined by P value < 0.01 and fold change >1.5 and <-1.5, respectively. **E.** Phage  
 244 to host ratios of viral OTUs detected in Figure 3D and 3F. **F.** Phage to host ratios of viral OTUs detected in Figure 3D against samples' levels

245 of PSA's promoter ON orientation analyzed from the IBDMDB cohort, based on the count table from Nishiyama et al. (2020). **G.** Differential  
246 viral taxonomic units' abundance, (from the IBDMDB cohort, count table from Nishiyama et al. (2020).), between samples with low ON  
247 orientation of the CPS3 promoter (<40%) and high ON orientation (>60%), in the IBDMDB cohort. Differentially abundant viral taxonomic  
248 units were detected by the DeSeq2 algorithm (Wald test,  $p < 0.01$ ). Red dots indicate differentially abundant bacteria that were determined  
249 by P value  $< 0.01$  and fold change  $> 1.5$  and  $< -1.5$ , respectively.  
250

## 251 **Bacteriophage exposure drives phase variation and reduction in Treg cells population**

252 Since a higher abundance of bacteriophages were correlated with the PSA promoter in the 'OFF'  
253 orientation, we sought to study whether encounter with bacteriophage can alter the orientation of  
254 this promoter in *B. fragilis*. We started by isolating a bacteriophage from sewage that we designated  
255 bacteriophage Barc2635 that makes plaques on a lawn of *B. fragilis* NCTC934 [**Supp Figure 1A**]. We  
256 sequenced the phage genome (GenBank accession: MN078104) and characterized its morphology by  
257 electron microscopy [**Supp. Figure 1B**]. Barc2635 is a double-stranded DNA lytic bacteriophage of  
258 45990 bp with a GC content of 38.9%, containing 67 putative CDS belonging to the *Siphoviridae* family  
259 and the *Caudovirales* order [**Supp. Figure 1C**]. Interestingly, increased abundance of bacteriophages  
260 from the *Caudovirales* order were found to be correlated with IBD patients (UC and CD)<sup>34</sup>. We  
261 analyzed the sequence similarities of Barc2635, with the *B. fragilis* associated bacteriophages  
262 identified in the IBDMDB<sup>33</sup> and found that Barc2635 is most similar to a cluster of bacteriophages,  
263 including viral OTUs 0791 and 0820 which were associated with active disease<sup>33</sup> [**Figure 4A**].

264 To test whether this bacteriophage causes changes in relative orientations of the PSA promoter in  
265 populations of *B. fragilis*, we monocolonized GF mice with *B. fragilis* NCTC 9343 in the presence or  
266 absence of bacteriophage Barc2635 and analyzed genomic-wide DNA inversion states [**Figure 4B**]. In  
267 the presence of Barc2635, *B. fragilis* exhibited prolonged alterations in the orientations of invertible  
268 regions affecting outer surface components such as polysaccharide utilization loci (PULs), ABC  
269 transporters and capsular polysaccharides, including PSA [**Supp. Table 4**]. In response to  
270 bacteriophage, a higher percentage of the population had the PSA promoter in the 'OFF' state [**Supp.**  
271 **Figure 2A**], with a concomitant increase in the percentage of the population with the PSF promoter  
272 orientated 'ON' [**Supp. Figure 2B**]. Throughout the experiment (42 days), Barc2635 and *B. fragilis* co-  
273 existed in gnotobiotic mice, with mild fluctuations in their abundances [**Supp. Figure 2C**]. Ten days  
274 after the initial colonization, we quantified expression of the first gene of the PSA locus, *upaY*<sup>35</sup>. *upaY*  
275 expression requires that the PSA promoter be oriented 'ON', and that no inhibitory UpxZ products  
276 from other loci are produced<sup>36</sup>. **Figure 4C** shows a significant reduction in *upaY* expression in mice  
277 containing Barc2635 in comparison to mice with bacteria alone. To directly measure the levels of PSA  
278 on the surface of the *B. fragilis* population, we used specific antibodies and monitored surface PSA by  
279 flow cytometry. The percentage of bacterial cells expressing PSA from mice with bacteriophage  
280 Barc2635 was significantly lower in comparison to bacterial cells from mice without the bacteriophage

281 **[Figure 4D]**, in agreement with the *upaY* expression levels. In both groups of mice (i.e., *B. fragilis* alone  
282 and *B. fragilis* with Barc2635), the CFU levels of *B. fragilis* were comparable, with a  $10^{0.5}$  difference  
283 **[Supp. Figure 2D]**, and no phages were detected in the *B. fragilis* monocolonized group (i.e., without  
284 bacteriophage inoculation) **[Supp. Figure 2E]**.

285 In a previous study, we demonstrated that phase variation of specificity proteins for a Type I  
286 restriction-modification system (R-M) of *B. fragilis* results in altered transcription of some capsular  
287 polysaccharides with potential altered immunomodulatory functionality of these bacteria<sup>7</sup>. Since the  
288 Type I R-M systems are known to provide protection against bacteriophage<sup>37-40</sup>, we used long-reads  
289 sequencing to quantify the orientations of the genes encoding the Type I R-M specificity proteins upon  
290 exposure to Barc2635. Our results demonstrate different patterns of specificity gene combination in  
291 the expression locus in *B. fragilis* isolated from mice inoculated with the phage compared to those not  
292 exposed to phage **[Figure 4E]**.

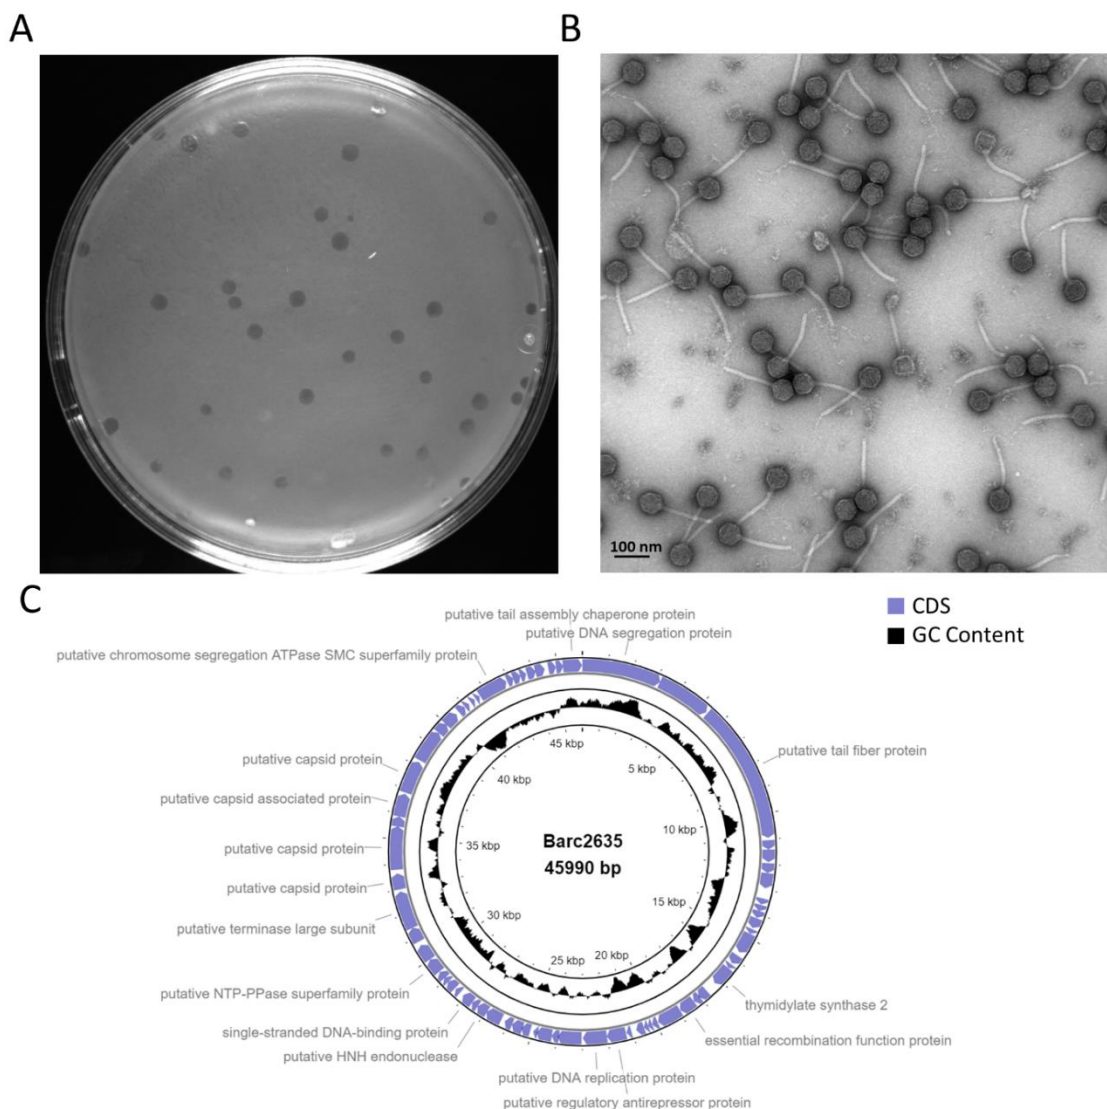

293

294 **Supplemental Figure 1: Characterization of Bacteriophage Barc2635**

295 A. A representative transmission electron microscopy of Barc2635. B. Barc2635 plaques on a lawn *B. fragilis* NCTC 9343. C. Genome  
296 structure, GC content, and putative annotations of Barc2635. CDS: coding sequence.

297

298 The PSA of *B. fragilis* induces regulatory T cells (Tregs, CD4<sup>+</sup>Foxp3<sup>+</sup>Rorg<sup>+</sup>) in the colonic lamina propria  
299 of mice<sup>41–44</sup>. To monitor the effect of intestinal Barc2635 during *B. fragilis* colonization on the  
300 CD4<sup>+</sup>Foxp3<sup>+</sup>Rorg<sup>+</sup> Tregs population, we extracted cells from the colonic lamina propria and  
301 immunophenotyped them by flow cytometry. We found that in the presence of Barc2635, the  
302 CD4<sup>+</sup>Foxp3<sup>+</sup>Rorg<sup>+</sup> Tregs population is decreased in concert with the decrease in the *upaY* transcription,  
303 coinciding with less surface production of the immunomodulatory PSA [**Figure 4F**, **Figure 4G**]. These  
304 data link phage to alterations in bacterial functionality with concomitant effects on host physiology.

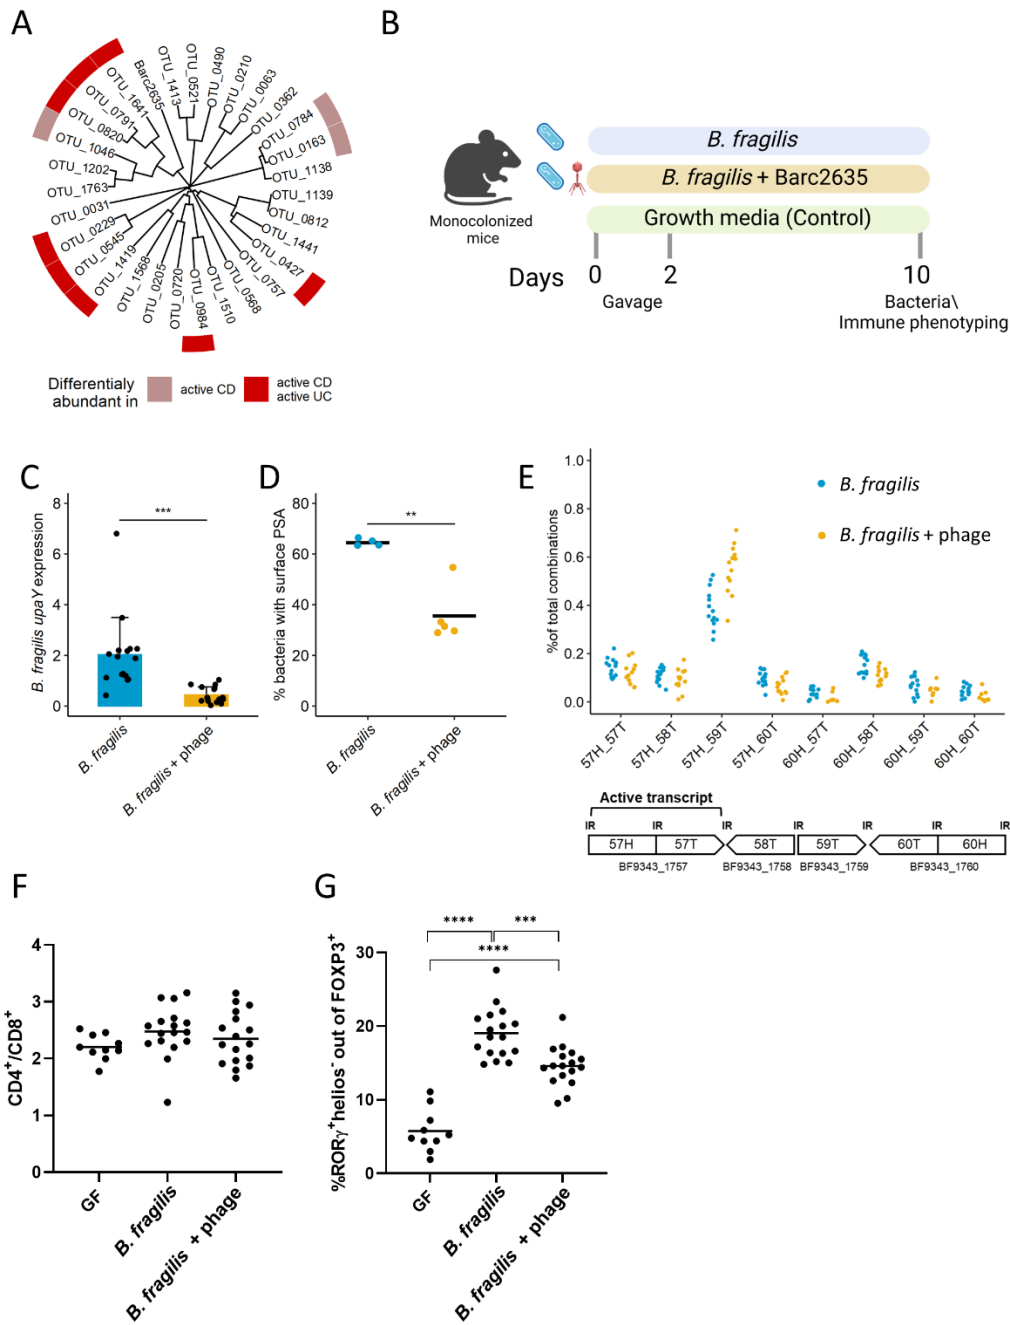

305

306 **Figure 4: Phage exposure alters expression of the PSA locus and PSA surface**

307 **A.** Phylogenetic tree based on the whole genome of viral OTUs identified as bacteriophages against *B. fragilis* as well as bacteriophage  
 308 Barc2635. MAFFT was used to perform multiple sequence alignment. The average-linkage method was used to construct the phylogenetic  
 309 tree with 1000 bootstrap replicates. Colors denote association between the viral OTUs abundances in Nishiyama et al. (2020), IBDMDB  
 310 cohort, with active Crohn's disease (light red) or with both active Ulcerative colitis and active Crohn's disease (red). **B.** Experimental design  
 311 of *in vivo* experiments. **C.** Expression levels of *upaY* in ceca of mice monocolonized with *B. fragilis* vs. mice monocolonized and infected with the  
 312 Barc2635 bacteriophage. Levels are shown as  $2^{(-\Delta\Delta CT)}$  with *rpsL* as a reference gene. Each dot represents a mouse. \*\*\*\* $P < 0.0001$ ,  
 313 Mann-Whitney test. **D.** PSA presence on the surface of *B. fragilis* exposed to the Barc2635 bacteriophage, detected by anti-PSA antibodies.  
 314 Bacteria were analyzed by flow cytometry for the expression of PSA, using Rabbit anti PSA antibodies. Each dot represents a mouse. **E.**  
 315 Percent of the bacterial population with each of the phase-variable Type-I R-M specificity gene combinations at the expression locus. Each  
 316 dot represents a mouse. IR: inverted repeat. **F.** CD4<sup>+</sup> to CD8<sup>+</sup> ratio out of CD45<sup>+</sup>TCR $\beta^+$  live cells in colon. Single cells were isolated from colon  
 317 lamina propria. Immune cells were analyzed by flow cytometry. Each dot represents a mouse. **G.** ROR $\gamma^+$  helios<sup>-</sup> percentages out of FOXP3<sup>+</sup>  
 318 cells in colon. Single cells were isolated from colon lamina propria. Immune cells were analyzed by flow cytometry. Each dot represents a  
 319 mouse. \*\*\* $P < 0.001$ , \*\*\*\* $P < 0.0001$ , one-way analysis of variance (ANOVA).

320

321

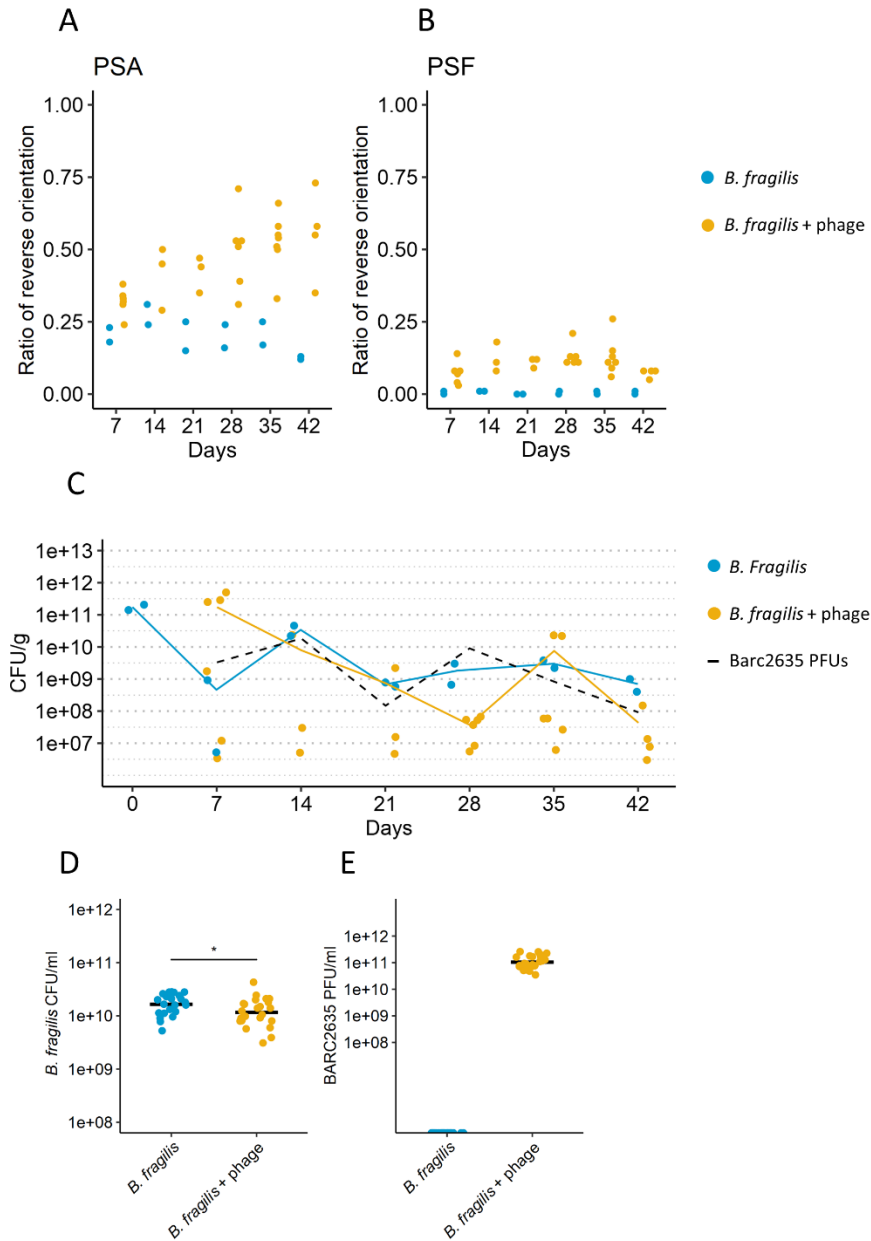

322

323

324

**Supplemental Figure 2**

**A.** Ratio of *B. fragilis* PSA promoter reverse orientation in mice fecal samples measured by the PhaseFinder tool, on different days of the experiment. Blue: *B. fragilis*, yellow: *B. fragilis* + Barc2635. **B.** Ratio of *B. fragilis* PSF promoter reverse orientation in mice fecal samples measured by the PhaseFinder tool, on different days of the experiment. Blue: *B. fragilis*, yellow: *B. fragilis* + Barc2635. **C.** CFUs of *B. fragilis* in fecal samples of mice monocolonized with *B. fragilis* (blue) or colonized with *B. fragilis* + phage (yellow); PFUs of Barc2635 in fecal samples of mice colonized with *B. fragilis* + phage (dashed black line). **D.** CFUs of *B. fragilis* in fecal samples of mice monocolonized with *B. fragilis* (blue) or colonized with *B. fragilis* + phage (yellow) (Wilcoxon rank sum test,  $*p < 0.05$ ). **E.** PFUs of Barc2635 in fecal samples of mice monocolonized with *B. fragilis* (blue) or colonized with *B. fragilis* + phage (yellow).

332

333

334

335

336



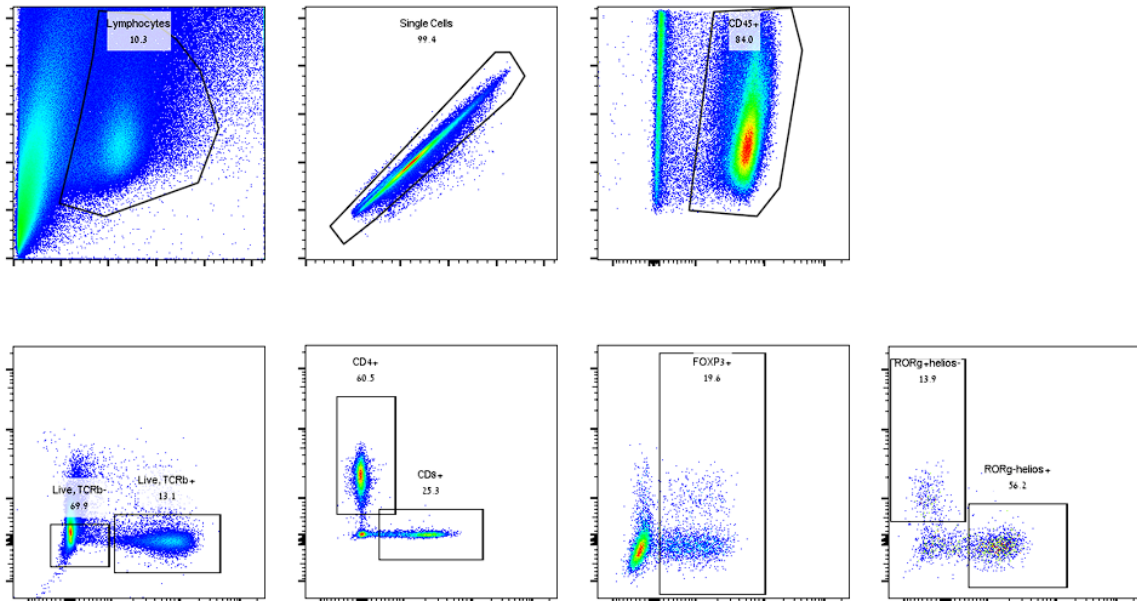

337

338 **Supplemental Figure 3 – gating strategy**

339 Representative flow cytometry plots demonstrating the gating strategy for the staining panel.

340

341 **Discussion**

342 Phase variations, prevalent in host-associated species, especially in the abundant gut Bacteroidales  
343 order<sup>9</sup>, contribute to bacterial fitness in changing ecosystems, such as the human gut. Reversible DNA  
344 inversions lead to phase variable synthesis of numerous molecules (e.g. surface, regulatory, and other  
345 molecules), and as such, confer functional plasticity. Our study reveals that phase variable states of  
346 certain molecules correlate with gut inflammation, with potential implications on host physiology. By  
347 analyzing six different public databases of IBD patients (CD and UC) and controlled mice experiments,  
348 we identify multiple invertible genomic regions that map to 25 different Bacteroidales strains.  
349 Notably, we find that both intergenic regions (e.g. promoters) and intragenic regions (e.g. genomic  
350 shufflons) exhibit altered genomic phase variable states in gut inflammatory conditions - both  
351 affecting gene expression.

352 The most prevalent genomic regions that demonstrated differential orientations of invertible regions  
353 were in *susC/susD* homologs and polysaccharide (PS) promoters - both with immunomodulatory  
354 potential. An epitope of *SusC*-like proteins, part of the starch-utilization system in *Bacteroidetes*, was  
355 recently shown to elicit T cell responses in IBD patients and healthy controls<sup>45</sup>, suggesting that operons  
356 that include *SusC* homologs might confer immunomodulatory properties to the bacteria, and phase  
357 variation in such genes might alter bacteria-host interactions. Among the phase-variable PSs, the anti-

358 inflammatory polysaccharide A (PSA) promoter of *B. fragilis* showed a higher percentage of reverse  
359 oriented reads in IBD patients compared to healthy controls, indicating that the 'OFF' orientation was  
360 more prevalent in IBD patients, potentially limiting the protective, anti-inflammatory, effects of PSA.  
361 These results align with a previous study<sup>46</sup> that focused on the PSA promoter of *B. fragilis* in IBD  
362 patients using PCR digestion of biopsy samples.

363 We further find that some DNA inversion states, like the PSA promoter of *B. fragilis*, are dynamic and  
364 can respond to changes in their local environment, specifically during inflammation. Our analysis  
365 focused on the bacterial population level, and therefore the DNA inversions could either occur in  
366 individual bacterial cells in response to inflammation, or as a selection process on the bacterial  
367 population level, where those with the promoter OFF orientation are enriched under inflammatory  
368 conditions.

369 Intriguingly, the preferential 'OFF' orientation of the PSA promoter of *B. fragilis* did not occur to the  
370 same extent in inflamed monocolonized mice as it did in both the inflamed mice colonized with a  
371 human microbiota and when bacteria are grown in patients' fecal filtrates. These results suggest that  
372 environmental factors in humanized mice and patients are necessary for this effect. Our analysis of  
373 phage OTUs in the IBDMDB cohorts revealed enrichment of *B. fragilis* associated viral OTUs in samples  
374 where the PSA promoter was present in the 'OFF' orientation. In addition, exposure of *B. fragilis* to  
375 Barc2635 resulted in the PSA promoter 'OFF' orientation, suggesting a role for gut bacteriophages in  
376 bacterial phase variation.

377 Type I restriction-modification (R-M) systems provide protection against bacteriophages by identifying  
378 and restricting foreign DNA. We previously characterized a phase variable Type I R-M system of *B.*  
379 *fragilis* that regulates distinct transcriptional programs affecting polysaccharide synthesis. Along with  
380 the effects on the PSA promoter orientation, infection with Barc2635 also triggered genomic inversion  
381 of this Type I R-M system towards inhibition of PSA synthesis<sup>7,36</sup>.

382 The anti-inflammatory effects of PSA are mediated by upregulation of Tregs and subsequent induction  
383 of IL-10 secretion<sup>12,13</sup>. We found that the Treg cells populations decreased in *B. fragilis* monocolonized  
384 mice infected with Barc2635, suggesting that the PSA 'OFF' trigger of Barc2635 has implications on  
385 the host immune system<sup>11</sup>. Applying the same analysis to *B. thetaiotaomicron*'s CPS3, we observed  
386 bacteriophages that are more abundant in samples with a higher ratio of CPS3 'ON' oriented  
387 promoters, however, the bacteriophage to host ratios per sample were too low to conclude that *B.*  
388 *thetaitaomicron* bacteriophages lead to populations with altered CPS3 synthesis. Altogether, we  
389 demonstrate differential orientations of invertible regions in IBD and elucidate the bacteriophages as

390 a potential trigger. These phase variations result in bacterial functional plasticity affecting the host  
391 immune system. Bacteriophages are an example of an environmental factor that can alter phase  
392 variable states. However, within the inflamed gut there are numerous factors that can potentially alter  
393 phase variable states. These include the microbiome<sup>33,47-50</sup> (e.g. neighboring bacteria and viruses), the  
394 gut metabolome<sup>47</sup>, an altered immune system<sup>51</sup> and physical alterations in the intestine such as  
395 abnormal pH concentrations<sup>52</sup>, osmotic<sup>53,54</sup> and oxidative stress<sup>55,56</sup>. For example, Tropini et al.<sup>57</sup>  
396 showed that PEG induced osmotic perturbation resulted in an increased ratio of CPS4 to CPS5 in *B.*  
397 *thetaiotaomicron*.

398 This study demonstrates that alterations in invertible genomic regions, and consequently molecular  
399 phase variations in gut bacteria, during IBD, can potentially influence the host immune system and  
400 inflammatory state. These phase variations can occur in response to changes in gut environmental  
401 factors during inflammation, including, but not limited to bacteriophages. Future studies integrating  
402 bacterial DNA inversions and phase variation analyses may illuminate the role of bacterial functional  
403 plasticity in additional physiological states, possibly resulting from different environmental factors,  
404 which may drive alterations in microbe-host interactions.

#### 405 **Limitations of the Study:**

406 The six databases analyzed in this study included adults and children, healthy controls and inflamed  
407 patients (before and after treatment) and longitudinal samples. The impact of each of these factors,  
408 and the impact of diet and lifestyle, merit further research. The PhaseFinder<sup>9</sup> algorithm that we  
409 applied identifies DNA inversions in short reads. As such, our analysis does not include other phase  
410 variation mechanisms like duplications or insertions. Also, analysis of short reads of metagenomics  
411 sequencing data might overlook inversions resulting from long structural genomic alterations<sup>3,7,58</sup>.  
412 Furthermore, metagenomic sequencing data averages the whole bacterial population of samples,  
413 implying a dilution factor for low abundant bacteria. Moreover, genomic inversion sites might  
414 interfere with genome sequence assemblies, leading to incomplete genomes, and thus could be  
415 overlooked when applying tools that search inversions in reference genomes. This study used an  
416 identified and isolated lytic bacteriophage for *B. fragilis*, further studies are required to elucidate the  
417 functional effects of IBD associated lytic and temperate bacteriophages. With these limitations  
418 notwithstanding, our study highlights the importance of considering bacterial phase variation in the  
419 context of IBD and its potential impact on inflammation and on altered microbe-host interactions.

420 Methods

421 Mice

422 All mouse work was in accordance with protocols approved by the local IACUC committee under  
423 approval numbers: IL-151-10-21 and IL-105-06-21.

424 Males, 4-5 weeks-old Germ-Free (GF) C57BL/6 or Swiss Webster mice from the Technion colony were  
425 used. Mice were housed and maintained in a GF care facility and were provided with food and water  
426 *ad libitum*; they were exposed to a 12:12 h light-dark cycle at room temperature.

427 Humanized mice were created by oral gavage of GF C57BL/6 mice with human feces from a single  
428 healthy human donor, spiked with *B. fragilis* NCTC 9343.

429 Monocolonized mice were created by oral gavage of GF C57BL/6 mice with *B. fragilis* NCTC 9343.

430

431 For the prolonged experiments of Barc2635 and *B. fragilis* co-existence in gnotobiotic mice, female  
432 Swiss Webster GF mice were administered with *B. fragilis* NCTC 9343 and bacteriophage Barc2635, or  
433 *B. fragilis* only. All administrations were performed by oral gavage. On day 49 mice were sacrificed for  
434 bacteria and immune phenotyping.

435

436 For phage immunomodulation studies, GF mice were gavaged twice (on day 0 and on day 2) with *B.*  
437 *fragilis* NCTC 9343 and bacteriophage Barc2635, *B. fragilis* only, or growth media as control. On day  
438 10 mice were sacrificed for bacteria and immune phenotyping.

439

440 DSS model

441 For acute DSS-induced colitis, humanized mice were treated with 3% Dextran sodium sulfate in their  
442 drinking water for 9 days followed by 5 days recovery before sacrificing. The control animals were  
443 administered distilled water.

444 Fecal samples were obtained on days 0, 6, 9 and 14 (before DSS treatment, during and after  
445 discontinuing DSS treatments), for further analyses.

446

447 Mice Inflammation measurement

448 Fecal supernatants were prepared after suspension in 1:10 sterile PBS and centrifugation at 4,500xg  
449 for 15 minutes. Enzyme-linked immunosorbent assay (ELISA) to measure calprotectin concentrations  
450 was performed using Mouse S100A8/S100A9 Heterodimer kit according to the manufacturer protocol  
451 [R&D systems].

452 Mice weights were assessed using an electronic scale at the same daytime.

453

454 qPCR and primers

455 DNA was extracted from fecal samples using ZymoBIOMICS DNA Miniprep Kit [Zymo research]. The  
456 'ON'/'OFF' orientation of the PSA promoter in the extracted DNA samples was determined by  
457 quantitative polymerase chain reaction (qPCR) using SYBR® Green mix [Thermo Fisher Scientific]. Two  
458 sets of primers were designed to target the PSA locus. One set was used as a proxy to the number of  
459 bacteria in the samples and targeted *UpaY*, the first gene immediately downstream to the promoter  
460 region. The second set of primers targeted the promoter region and would only produce a product  
461 when the orientation is 'ON'. The ratio of 'ON'/'OFF' PSA orientation in the samples was calculated  
462 using the  $2^{-\Delta\Delta CT}$  method calculated against the PSA locked 'ON' results (100% 'ON' orientation).

463

464 *upaY* gene expression was determined by RT-qPCR. RNA was extracted from fecal samples using  
465 zymoBIOMICS RNA miniprep kit [Zymo research]. Reverse transcription of RNA to cDNA was  
466 performed using the qScript cDNA Synthesis Kit [Quantabio]. *upaY* mRNA levels were determined by  
467 qPCR using SYBR® Green mix [Thermo Fisher Scientific] with primers against *rpsL* as a reference gene.  
468 The  $2^{-\Delta\Delta CT}$  method was employed for the specificity fold change tests.

469 Primers:

|               |                          |
|---------------|--------------------------|
| B_Frag_upaY_F | CGCTCGGACAAAGAAGGACC     |
| B_Frag_upaY_R | ACTTCTACCCTACGACGACGA    |
| B_Frag_PSA_M  | GGTGTTCCTCAAAGACGAACGT   |
| B_Frag_PSA_F  | TGTGTAAATGATAGGAGGCTAGGG |
| rpsL_F        | CCGAACTCTGCAATGCGTAA     |
| rpsL_R        | CGCGAACCAGTACGATTGAG     |

470

471 Mice feces sequencing

472 DNA samples underwent quality control by Qubit fluorescence analysis to determine concentration of  
473 DNA for downstream analysis (ThermoFisher, Cat. Q32850). Libraries were prepared using the Illumina  
474 Tagmentation DNA prep streamlined library preparation protocol according to manufacturer's  
475 instructions with a minimum of 50 ng of DNA starting mass and 8 cycles of PCR enrichment, ending  
476 with a fragment size of 550 bp. IDT for Illumina DNA/RNA UD indexes and Nextera DNA CD indexes  
477 were used (Illumina IDT, Cat. 20027213; Illumina Nextera, Cat. 20018708).

478 All libraries were diluted to 15 pM in 96-plex pools and validated on 100-cycle paired-ends read Miseq  
479 V2 runs (Illumina, Cat. MS-102-2002), before shipping to the US at 4 nM for sequencing on the  
480 Novaseq 6000 in S4 mode at 96-plex in a 300-cycle paired-end reads run, with an estimated read depth  
481 of 30 Gbp per sample (Illumina, Cat. 20028312). Final loading concentration of 600 pM. All sequencing  
482 runs were performed with a spike-in of 1% PhiX control library V3 (Illumina, Cat. FC-110-3001).

483

#### 484 Taxonomic profiling

485 Community profiling was performed using metaphlan4 v4.0.0<sup>59</sup> with mpa database vJan21. For each  
486 sample, the forward reads were first aligned against the mpa database using bowtie2 v2.3.5.1<sup>60</sup>  
487 (flags `--sam-no-hd --sam-no-sq --no-unal --very-sensitive`). Next, the resulting  
488 sam file was analyzed by metaphlan4 with default parameters. In each analysis, species at abundance  
489  $\leq 0.1\%$  were ignored.

490

#### 491 Microbiome analysis

492 Statistical analysis of sequenced data was initially performed using MicrobiomeAnalyst<sup>61</sup> followed by  
493 comprehensive analysis using R packages: Phyloseq<sup>62</sup>, Vegan<sup>63</sup> and DESeq2<sup>64</sup>. Differences in microbial  
494 taxa and functional modules were assessed by differential abundance analyses using DESeq2<sup>64</sup>. Alpha  
495 diversity indices (observed species and Shannon) were compared using the Kruskal–Wallis rank sum  
496 test. Beta diversity distance matrices (Bray-Curtis) were compared using the vegan package's function  
497 ADONIS, a multivariate ANOVA based on dissimilarity tests and visualized using PCoA. Results were  
498 visualized using the ggplot2 R package<sup>65</sup>.

499

#### 500 Identification of DNA inversion sites

501 Representative *Bacteroides* species were selected from an in-house database of human-associated  
502 microbial species. The database was constructed from 118K metagenomics assembled genomes  
503 (MAGs) recovered from human-associated metagenomics samples. Taxonomy assignment was  
504 performed using gtdbtk v2.0.0 and GTDB release 207 with the classify\_wf program and default  
505 parameters<sup>66</sup>. Overall, 36 *Bacteroides* species were identified of which 35 had species-level GTDB  
506 taxonomy assignments. For each of these species, the representative genome from GTDB was used  
507 for the PhaseFinder analysis. We have also included the genomes of two additional *B. fragilis* strains,  
508 *Phocaeicola dorei*, and *Parabacteroides distasonis*. Overall, 40 genomes were included. Information  
509 about the genomes is provided in Table S1.

510 PhaseFinder<sup>9</sup> (v1.0) was used to identify invertible sites in the metagenomics samples. The default  
511 parameters of PhaseFinder were used. We filtered the results by removing identified sites with  $< 20$

512 reads supporting either the forward or reverse orientations combined from the paired-end method,  
513 mean  $Pe\_ratio < 1\%$  across all samples, and sites within coding regions of rRNA products. To compare  
514 DNA orientation patterns between CD and UC patients with those of healthy controls, we focused on  
515 sites that displayed a difference of over 10% between at least one of the groups. The Wilcoxon rank  
516 sum test was employed to conduct these comparisons, and the Benjamini-Hochberg method was  
517 utilized to correct for multiple comparisons, with a false discovery rate (FDR) set at less than 0.1. Each  
518 invertible region was manually curated to assess its coding regions, gene annotations, and their  
519 putative functions. Briefly, genomic regions were visualized online using the NCBI Graphical Sequence  
520 Viewer (version 3.47.0). Invertible regions with coding sequences (CDS) within them, were annotated  
521 according to the CDS name(s). Invertible regions lacking CDS within them were searched for CDSs that  
522 start in proximity to the invertible DNA sites ( $< 200 \sim bp$ ). CDSs in the region (four upstream and four  
523 downstream) were used to assess the functionality of the region. Regions containing or in proximity  
524 to rRNA and tRNA genes were filtered from the comparisons as well as invertible regions with no CDSs  
525 start in proximity to the inverted repeats.

526

#### 527 Bacteriophage isolation

528 For isolation of bacteriophages, inflowing raw sewage for a waste-water treatment plant (WWTP)  
529 from Barcelona (Spain) was filtered through low protein binding 0.22  $\mu m$  pore size polyethersulfone  
530 (PES) membrane filters (Millex- GP, Millipore, Bedford, Massachusetts) to remove bacteria. Isolated  
531 plaques were obtained by the double-agar layer technique<sup>67</sup>. Briefly, tubes containing 2.5 ml of soft  
532 BPRM-agar kept at 45°C were inoculated with 1 ml of an exponential growth phase culture  
533 ( $OD_{600}=0.3$ , corresponding to ca  $2 \times 10^8$  CFU / ml) of the host bacteria grown in BPRM broth and 1 ml  
534 of the filtered sewage sample. After gently mixing, the contents of each tube were poured onto a plate  
535 of BRPM-agar and incubated inside GasPak (BBL) jars at 37°C. Plaques were clearly spotted after 18 h  
536 of incubation.

537 For phage isolation, discrete well-isolated plaques were stabbed with a sterile needle and inoculated  
538 in a tube containing 5 ml of BRPM broth. Then 1-ml of a culture of *B. fragilis* NCTC 9343 in exponential  
539 growth was inoculated into the tube, which was then incubated for 18h at 37 °C. After incubation, an  
540 aliquot of the culture was treated with chloroform (1:10 (v:v), vigorously mixed for 5 minutes and  
541 centrifuged at 16,000 $\times g$  for 5 minutes<sup>68</sup>. The supernatant containing the phage suspensions were  
542 further filtered through low protein binding 0.22  $\mu m$  pore size polyethersulfone (PES) membrane  
543 filters (Millex-GP, Millipore, Bedford, Massachusetts), diluted and plated as indicated in the previous  
544 paragraph to verify the uniformity of the plaques. Then, one well differentiated plaque was stabbed

545 and the whole operation repeated to obtain a high titer, over  $1 \times 10^9$  plaque forming units (PFU), phage  
546 suspensions.

547

#### 548 Phage genome sequencing

549 5hrs induction of phage DNA, phage particles were PEG-precipitated (6,000-12,000 MW, 8%), and  
550 isolated by a CsCl gradient; 33 g, 41 g, 55 g in 50 ml TM buffer (50mM Tris-Cl pH8.0, 10mM MgCl<sub>2</sub>),  
551 ultracentrifuged at 40,000 rpm for 1.5hrs, and dialyzed overnight in 100mM Tris pH7.5, 1M NaCl,  
552 1mM EDTA 56. Genomic DNA was extracted using phenol-chloroform as described 57.

553 Illumina sequencing of Bacteroides phage Barc2635 was performed at the Biopolymers Facility,  
554 Harvard Medical School, Department of Genetics, producing paired-end reads of 150 bp. Adapter  
555 sequence removal and quality trimming was performed using BBDuk, part of the BBTools (v 37.50)  
556 suite of programs. The reads were further screened against NCBI's UniVec\_Core database (build  
557 10.0) and the *B. fragilis* NCTC 9343 genome sequence using blastn and reads that returned a  
558 significant hit to either were removed. The phage genome was assembled de novo using Velvet  
559 1.2.10 under a k-value determined by Velvet Optimizer (v. 2.2.5). The genome was annotated using  
560 an in-house customized version of Prokka v1.12, submitted to NCBI, and assigned GenBank accession  
561 MN078104. Phage Genome map [**Supp. Figure 1C**] was visualized using the online tool Proksee  
562 (<https://proksee.ca/>, accessed on 21 January 2023).

#### 563 Viral OTUs multiple alignment

564 Alignments and phylogenetic tree of whole genomes of viral OTUs identified as bacteriophages against  
565 *B. fragilis*<sup>33</sup> as well as bacteriophage Barc2635 were generated using MAFFT online service (version 7).  
566 Multiple sequence alignment was done using the default settings of the site. Phylogenetic tree was  
567 constructed using the average-linkage method with 1000 bootstrap replicates and was visualized with  
568 R package ggtree<sup>69</sup> (version 3.4.4).

#### 569 MinION library preparation and sequencing

570 The specificity region of BF9343\_1757–1760 was amplified by PCR from a population of bacteria  
571 grown in vitro and in vivo from fecal content as described above. The primers annealed outside the  
572 invertible region. The amplicons were purified by Wizard SV Gel and PCR Clean-Up System (Promega)  
573 and measured by nanodrop.

574 Primers:



Type1RM\_hsdS\_F GACAATCGAGATGAAGAACAAC  
Type1RM\_hsdS\_R CCATAGGCGTATGATTCCTG

575

576 DNA quantity was measured again using Qubit fluorometry (Thermo Fisher Scientific, Waltham, MA,  
577 USA). Nanopore sequencing libraries were prepared from 200 fmol purified amplicons using Ligation  
578 Sequencing Kit 1D (SQK-LSK109) and PCR-free Native Barcoding Expansion Kit (EXP-NBD104) (Oxford  
579 Nanopore Technologies, Oxford, England). The barcoded libraries were loaded and sequenced on the  
580 MinION device controlled by MinKNOW software (v.19.12.5) using MinION flow cells (FLO-MIN106D  
581 R9.4.1, Oxford Nanopore Technologies, Oxford, England) after quality control runs. The raw data were  
582 base called and demultiplexed by Guppy Basecalling Software (v. 3.3.3+fa743a6).

### 583 MinION data analysis

584 Adapters and barcodes sequences were removed from the reads using Porechop (v0.2.4, available  
585 from <https://github.com/rrwick/Porechop>). Reads were oriented using the 'Preparing Reads for  
586 Stranded Mapping' protocol (Eccles, D.A. (2019). *Protocols.io*<sup>70</sup>). We aligned the reads to the PCR  
587 forward primer using LASTAL (v.1060)<sup>71</sup>, and then reverse-complemented the reverse-oriented reads.  
588 The reads were combined to an all forward oriented file and cropped to the first 1300 bases using  
589 Trimmomatic (v.0.39)<sup>72</sup>. The reads were then split according to their alignment to the 1757-57 or 1757-  
590 60 5" half sequences using LASTAL. Reads were mapped to the full sequences with Minimap2 (v.2.17-  
591 r941)<sup>73</sup> using the `-for-only` and `asm20` options. Mapped read counts were extracted from the  
592 Minimap2 SAM output using SAMtools (v.1.7)<sup>74</sup>.

593 MinION sequence data has been deposited in the NCBI sequence read archive (SRA) under the  
594 BioProject accession number: PRJNA948162

### 595 Fecal filtrates of patients

596 Recruitment of IBD patients for this study was conducted at the Rambam Health Care Campus (RHCC).  
597 The study was approved by the local institutional review boards with study numbers 0052-17 and  
598 0075-09 in which all patients consented to be included in it. During therapy, patients were treated  
599 either with Infliximab or Humira for at least two weeks.

600 Fecal samples were collected by patients at home prior to their clinic visit and collected from each at  
601 the hospital. The samples were then stored at -80°C until they were shipped to the laboratory for  
602 analysis.

603 Calprotectin levels were measured in each fecal sample using LIAISON Calprotectin (catalogue No.  
604 318960) according to the manufacturer's instructions. The levels of calprotectin in the fecal samples  
605 were used as a measure of disease activity in IBD patients.

606

#### 607 In vitro assays with fecal filtrates from IBD patients

608 *Bacteroides fragilis* NCTC 9343 was grown in Brain heart infusion (BHIS) supplemented with 5 mg/l  
609 hemin and 2.5 µg/l vitamin K to OD<sub>600</sub>~0.6 and centrifuged at 4,500xg for 5 minutes. Bacterial pellets  
610 were washed twice with sterile PBS to remove BHIS components and then suspended with 1mL  
611 supplemented M9 minimal media. Patients' fecal samples were suspended in sterile PBS (1:5),  
612 centrifuged at 4,500xg for 15 minutes, and supernatants were collected and filtered using the Medical  
613 Millex-VV Syringe Filter Unit, 0.22 µm, PVDF membrane. For the *in vitro* assay, *B. fragilis* was cultured  
614 in patients' supernatants and diluted in M9 minimal media in a 1:25:25 ratio (bacteria: fecal  
615 supernatants: media). Subsequently, 200µl of each culture was collected for DNA extraction at  
616 OD<sub>600</sub>~0.6.

617

618 M9 Medium was prepared as follows:

619 Per L:

620 1g NH<sub>4</sub>Cl

621 6g Na<sub>2</sub>HPO<sub>4</sub>

622 3g KH<sub>2</sub>PO<sub>4</sub>

623 0.5g NaCl

624 Supplements:

625 14.7mg CaCl<sub>2</sub>·2H<sub>2</sub>O (0.1ml 1M stock)

626 246mg MgSO<sub>4</sub>·7H<sub>2</sub>O (1ml 1M stock)

627 0.5% glucose (20ml 25%)

628 0.05% L-cysteine (10ml 5% stock)

629 5mg/ml Hemin (1ml 0.5% stock)

630 2.5mg/ml VitK<sub>1</sub> (0.5ml 0.5% stock)

631 2mg/ml FeSO<sub>4</sub>·7H<sub>2</sub>O (0.1ml 2% stock)

632 5ng/ml VitB12 (0.05ml 0.01% stock)

633

#### 634 Gut lamina propria preparation

635 For lamina propria immunophenotyping, mice colons were removed by cutting the colon from the  
636 cecum-colon junction to the anus. Fat tissue was carefully removed from colon tissue and further  
637 proceeded for single cell suspension preparation using lamina propria dissociation kit (Miltenyi),  
638 according to the manufacturer's protocol.

639

640

#### 641 Flow cytometry

642 Cell preparations for flow cytometry analysis were performed in 5 ml tubes or U shape 96 wells plates.  
643 Single cells were washed with PBS and stained for live/dead staining using 1:1,000 in PBS, Zombie  
644 fixable viability dye (Biolegend) for 10 minutes, at room temperature, and washed once with FACS  
645 buffer, by centrifuge at 300xg for 5 minutes. For FcR blocking, cells were incubated with 0.5 µg  
646 CD16/CD32 antibody for 10 minutes on ice and proceeded to further staining without a washing step.  
647 Extracellular markers were stained with the relevant antibody panels for 30 minutes on ice and  
648 washed twice with FACS buffer, by centrifuge at 300xg for 5 minutes. After the last wash, cells were  
649 fixed with Foxp3 Fixation/Permeabilization working solution (Thermo) for 16 hours at 4 °C in the dark.  
650 For Intracellular staining, cells were permeabilized using 1X Foxp3 permeabilization buffer (Thermo)  
651 according to the manufacturer protocol. For intracellular blocking, 2 µl of 2% rat serum (Stemcell  
652 technologies) was added to each well for 15 minutes at room temperature and proceeded to further  
653 staining without a washing step.

654 To quantify the percentage of *B. fragilis* from monocolonized mice with PSA on their surface, feces  
655 from monocolonized mice with *B. fragilis* with or without phage were suspended 1:10 in ice cold PBS  
656 (mg/µl) and centrifuged at 300xg for 5 minutes, 4°C. Supernatants were separated from pellets and  
657 further centrifuged at 4,500xg for 5 minutes, 4°C. Bacterial pellets were resuspended in an ice cold  
658 FACS buffer, 1:10 from initial PBS suspension. 100 µl of resuspended bacteria were incubated with  
659 1:1,000 Rabbit anti *B. fragilis* PSA for 30 minutes at 4°C. Bacteria were washed twice using an ice cold  
660 FACS buffer by centrifuge at 4,500xg for 5 minutes and then incubated with a donkey anti rabbit  
661 fluorophore conjugated secondary antibody. After staining steps, the bacteria were washed twice with  
662 an ice cold FACS buffer and finally resuspended in 500 µl ice cold PBS plus 1:1,000 Hoechst dye and  
663 analyzed by flow cytometry using FSC and SSC thresholds of 1,000, and logarithmic scale. Gating  
664 strategy is detailed in **Supplemental Figure 3**.

665

#### 666 Funding

667 This work was supported by the Technion Institute of Technology, 'Keren Hanasi', Cathedra, the  
668 Rappaport Technion Integrated Cancer Center, the Alon Fellowship for Outstanding Young  
669 Researchers, the Israeli Science Foundation (grant 1571/17 and 3165/20), Israel Cancer Research Fund  
670 Research Career Development Award, the Seerave Foundation, the Canadian Institute for Advanced  
671 Research (Azrieli Global Scholars; grant FL-000969), Human Frontier Science Program Career  
672 Development Award (grant CDA00025/2019-C), the Gutwirth foundation award and the European

673 Union (ERC, ExtractABact, 101078712). Views and opinions expressed are, however, those of the  
674 author(s) only and do not necessarily reflect those of the European Union or the European Research  
675 Council Executive Agency. Neither the European Union nor the granting authority can be held  
676 responsible for them. NGZ is an Azrieli Global Scholar at the Canadian Institute for Advanced Research,  
677 and a Horev Fellow (Taub Foundation). MJC and LC are supported by the Duchossois Family Institute.  
678 SC is supported by the Gutwirth Excellence Scholarship and by Teva Pharmaceutical Industries as part  
679 of the Israeli National Forum for BiInnovators (NFBI). HH is supported by Leonard and Diane Sherman  
680 Interdisciplinary Graduate School fellowship, Wjuniski Fellowship Fund for the MD/PhD Medical  
681 Scientist Program, and by VATAT fellowship for outstanding doctoral students from the Arab  
682 community fellowship.

### 683 [Acknowledgements](#)

684 We would like to thank the Geva-Zatorsky lab members for fruitful discussions and contributions.  
685 Thanking Zachary Merenstein and Neekoo Farahmandpour for helping in establishing the qPCR  
686 method; Dr. Svetlana Friedman, Ran Tahan and Prof. Debbie Lindell for advising us on the  
687 bacteriophage characterization and Dr. Carolina Tropini for insightful discussions. We thank Drs. Amir  
688 Grau, Ofer Shenker, and the biomedical core facility at the Technion Rappaport faculty of Medicine  
689 for their help with flow cytometry; BiotaX for metagenomics sequencing, and Prof. Ogata and Dr.  
690 Nishiyama from the Institute for Chemical Research, Kyoto University, for helping in accessing their  
691 data. Figures 2a, 3a and 4b were created with BioRender.com.

692

### 693 [Author contributions](#)

694 SC HH RZ DKK TG IS and NGZ conceived and designed the project. SC HH RZ DKK and TG performed  
695 and analyzed the experiments. SC, IS and NGZ planned the computational and analytical aspects; SC  
696 and IS performed the computational analyses. MJC and LC contributed to the computational analysis  
697 and interpretation of the results. SP and YC designed, lead, and executed the clinical study. KJ  
698 contributed to the phage-bacteria-host study and to the bacteriophage morphological  
699 characterization. JJ isolated the bacteriophage. NM RN, and NBA helped with the experiments. SC HH  
700 RZ TG IS LC and NGZ wrote the manuscript. SC RZ HH and DKK contributed equally to the study. All  
701 authors read and approved the manuscript. NGZ conceived and planned the study, supervised it,  
702 interpreted the experiments, and wrote the manuscript.

703

704

705



707 **References**

- 708 1. Moxon R, Bayliss C, Hood D. Bacterial contingency loci: The role of simple sequence DNA  
709 repeats in bacterial adaptation. *Annu Rev Genet.* 2006;40:307-333.  
710 doi:10.1146/annurev.genet.40.110405.090442
- 711 2. Phillips ZN, Tram G, Seib KL, Attack JM. Phase-variable bacterial loci: how bacteria gamble to  
712 maximise fitness in changing environments. *Biochem Soc Trans.* 2019;47(4):1131-1141.  
713 doi:10.1042/BST20180633
- 714 3. West PT, Chanin RB, Bhatt AS. From genome structure to function: insights into structural  
715 variation in microbiology. *Curr Opin Microbiol.* 2022;69:102192.  
716 doi:10.1016/J.MIB.2022.102192
- 717 4. Goldberg A, Fridman O, Ronin I, Balaban NQ. Systematic identification and quantification of  
718 phase variation in commensal and pathogenic Escherichia coli. *Genome Med.* 2014;6(11):112.  
719 doi:10.1186/s13073-014-0112-4
- 720 5. Krinos CM, Coyne MJ, Weinacht KG, Tzianabos AO, Kasper DL, Comstock LE. Extensive surface  
721 diversity of a commensal microorganism by multiple DNA inversions. *Nature.*  
722 2001;414(6863):555-558. doi:10.1038/35107092
- 723 6. Van Der Woude MW, Bäumlér AJ. Phase and Antigenic Variation in Bacteria. *Clin Microbiol*  
724 *Rev.* 2004;17(3):581. doi:10.1128/CMR.17.3.581-611.2004
- 725 7. Ben-Assa N, Coyne MJ, Fomenkov A, et al. Analysis of a phase-variable restriction  
726 modification system of the human gut symbiont *Bacteroides fragilis*. *Nucleic Acids Res.*  
727 2020;48(19):11040-11053. doi:10.1093/nar/gkaa824
- 728 8. Porter NT, Hryckowian AJ, Merrill BD, et al. Phase-variable capsular polysaccharides and  
729 lipoproteins modify bacteriophage susceptibility in *Bacteroides thetaiotaomicron*. *Nat*  
730 *Microbiol.* 2020;5(9):1170-1181. doi:10.1038/s41564-020-0746-5
- 731 9. Jiang X, Brantley Hall A, Arthur TD, et al. Invertible promoters mediate bacterial phase  
732 variation, antibiotic resistance, and host adaptation in the gut. *Science (1979).*  
733 2019;363(6423):181-187. doi:10.1126/science.aau5238
- 734 10. Mazmanian SK, Round JL, Kasper DL. A microbial symbiosis factor prevents intestinal  
735 inflammatory disease. *Nature.* 2008;453(7195):620-625. doi:10.1038/nature07008
- 736 11. Surana NK, Kasper DL. The yin yang of bacterial polysaccharides: lessons learned from *B.*  
737 *fragilis* PSA. *Immunol Rev.* 2012;245(1):13-26. doi:10.1111/j.1600-065X.2011.01075.x
- 738 12. Dasgupta S, Erturk-Hasdemir D, Ochoa-Reparaz J, Reinecker HC, Kasper DL. Plasmacytoid  
739 dendritic cells mediate anti-inflammatory responses to a gut commensal molecule via both  
740 innate and adaptive mechanisms. *Cell Host Microbe.* 2014;15(4):413-423.  
741 doi:10.1016/j.chom.2014.03.006
- 742 13. Round JL, Mazmanian SK. Inducible Foxp3+ regulatory T-cell development by a commensal  
743 bacterium of the intestinal microbiota. *Proc Natl Acad Sci U S A.* 2010;107(27):12204-12209.  
744 doi:10.1073/PNAS.0909122107

- 745 14. Chang YC, Ching YH, Chiu CC, et al. TLR2 and interleukin-10 are involved in *Bacteroides*  
746 *fragilis*-mediated prevention of DSS-induced colitis in gnotobiotic mice. *PLoS One*. 2017;12(7).  
747 doi:10.1371/JOURNAL.PONE.0180025
- 748 15. Ramos GP, Papadakis KA. Mechanisms of Disease: Inflammatory Bowel Diseases. *Mayo Clin*  
749 *Proc*. 2019;94(1):155-165. doi:10.1016/J.MAYOCP.2018.09.013
- 750 16. Guan Q. A Comprehensive Review and Update on the Pathogenesis of Inflammatory Bowel  
751 Disease. *J Immunol Res*. 2019;2019. doi:10.1155/2019/7247238
- 752 17. Corridoni D, Arseneau KO, Cominelli F. Inflammatory bowel disease. *Immunol Lett*.  
753 2014;161(2):231-235. doi:10.1016/J.IMLET.2014.04.004
- 754 18. Ha CWY, Martin A, Sepich-Poore GD, et al. Translocation of Viable Gut Microbiota to  
755 Mesenteric Adipose Drives Formation of Creeping Fat in Humans. *Cell*. 2020;183(3):666-  
756 683.e17. doi:10.1016/J.CELL.2020.09.009
- 757 19. Bolam DN, Koropatkin NM. Glycan recognition by the Bacteroidetes Sus-like systems. *Curr*  
758 *Opin Struct Biol*. 2012;22(5):563-569. doi:10.1016/J.SBI.2012.06.006
- 759 20. Kulagina E v., Efimov BA, Maximov PY, Kafarskaia LI, Chaplin A v., Shkoporov AN. Species  
760 composition of Bacteroidales order bacteria in the feces of healthy people of various ages.  
761 *Biosci Biotechnol Biochem*. 2012;76(1):169-171. doi:10.1271/BBB.110434
- 762 21. Kraal L, Abubucker S, Kota K, Fischbach MA, Mitreva M. The Prevalence of Species and Strains  
763 in the Human Microbiome: A Resource for Experimental Efforts. *PLoS One*. 2014;9(5):e97279.  
764 doi:10.1371/JOURNAL.PONE.0097279
- 765 22. Nomura K, Ishikawa D, Okahara K, et al. Bacteroidetes species are correlated with disease  
766 activity in ulcerative colitis. *J Clin Med*. 2021;10(8):1749. doi:10.3390/JCM10081749/S1
- 767 23. Proctor LM, Creasy HH, Fettweis JM, et al. The Integrative Human Microbiome Project.  
768 *Nature* 2019 569:7758. 2019;569(7758):641-648. doi:10.1038/s41586-019-1238-8
- 769 24. Turnbaugh PJ, Ley RE, Hamady M, Fraser-Liggett CM, Knight R, Gordon JI. The Human  
770 Microbiome Project. *Nature* 2007 449:7164. 2007;449(7164):804-810.  
771 doi:10.1038/nature06244
- 772 25. Qin J, Li R, Raes J, et al. A human gut microbial gene catalogue established by metagenomic  
773 sequencing. *Nature* 2010 464:7285. 2010;464(7285):59-65. doi:10.1038/nature08821
- 774 26. Imhann F, van der Velde KJ, Barbieri R, et al. The 1000IBD project: Multi-omics data of 1000  
775 inflammatory bowel disease patients; Data release 1. *BMC Gastroenterol*. 2019;19(1):1-10.  
776 doi:10.1186/S12876-018-0917-5/TABLES/2
- 777 27. Gevers D, Kugathasan S, Denson LA, et al. The treatment-naive microbiome in new-onset  
778 Crohn's disease. *Cell Host Microbe*. 2014;15(3):382-392. doi:10.1016/J.CHOM.2014.02.005
- 779 28. Lewis JD, Chen EZ, Baldassano RN, et al. Inflammation, Antibiotics, and Diet as Environmental  
780 Stressors of the Gut Microbiome in Pediatric Crohn's Disease. *Cell Host Microbe*.  
781 2015;18(4):489-500. doi:10.1016/J.CHOM.2015.09.008

- 782 29. Chassaing B, Aitken JD, Malleshappa M, Vijay-Kumar M. Dextran Sulfate Sodium (DSS)-  
783 Induced Colitis in Mice. *Current protocols in immunology / edited by John E Coligan . [et al].*  
784 2014;104(SUPPL.104):Unit. doi:10.1002/0471142735.IM1525S104
- 785 30. Shkoporov AN, Khokhlova E V., Stephens N, et al. Long-term persistence of crAss-like phage  
786 crAss001 is associated with phase variation in *Bacteroides intestinalis*. *BMC Biol.* 2021;19(1).  
787 doi:10.1186/S12915-021-01084-3
- 788 31. Qv L, Mao S, Li Y, Zhang J, Li L. Roles of Gut Bacteriophages in the Pathogenesis and  
789 Treatment of Inflammatory Bowel Disease. *Front Cell Infect Microbiol.* 2021;11.  
790 doi:10.3389/FCIMB.2021.755650
- 791 32. Adiliaghdam F, Amatullah H, Digumarthi S, et al. Human enteric viruses autonomously shape  
792 inflammatory bowel disease phenotype through divergent innate immunomodulation. *Sci*  
793 *Immunol.* 2022;7(70):eabn6660. doi:10.1126/SCIIMMUNOL.ABN6660
- 794 33. Nishiyama H, Endo H, Blanc-Mathieu R, Ogata H. Ecological Structuring of Temperate  
795 Bacteriophages in the Inflammatory Bowel Disease-Affected Gut. *Microorganisms.*  
796 2020;8(11):1-15. doi:10.3390/MICROORGANISMS8111663
- 797 34. Norman JM, Handley SA, Baldrige MT, et al. Disease-specific Alterations in the Enteric  
798 Virome in Inflammatory Bowel Disease. *Cell.* 2015;160(3):447.  
799 doi:10.1016/J.CELL.2015.01.002
- 800 35. Chatzidaki-Livanis M, Coyne MJ, Comstock LE. A family of transcriptional antitermination  
801 factors necessary for synthesis of the capsular polysaccharides of *Bacteroides fragilis*. *J*  
802 *Bacteriol.* 2009;191(23):7288-7295. doi:10.1128/JB.00500-09
- 803 36. Chatzidaki-Livanis M, Weinacht KG, Comstock LE. Trans locus inhibitors limit concomitant  
804 polysaccharide synthesis in the human gut symbiont *Bacteroides fragilis*. *Proc Natl Acad Sci U*  
805 *S A.* 2010;107(26):11976-11980. doi:10.1073/PNAS.1005039107
- 806 37. Noyer-Weidner M, Trautner TA. Methylation of DNA in prokaryotes. *EXS.* 1993;64:39-108.  
807 doi:10.1007/978-3-0348-9118-9\_4/COVER
- 808 38. Bickle TA, Krüger DH. Biology of DNA restriction. *Microbiol Rev.* 1993;57(2):434-450.  
809 doi:10.1128/MR.57.2.434-450.1993
- 810 39. Murray NE, Daniel AS, Cowan GM, Sharp PM. Conservation of motifs within the unusually  
811 variable polypeptide sequences of type I restriction and modification enzymes. *Mol*  
812 *Microbiol.* 1993;9(1):133-143. doi:10.1111/J.1365-2958.1993.TB01675.X
- 813 40. Sistla S, Rao DN. S-Adenosyl-L-methionine-dependent restriction enzymes. *Crit Rev Biochem*  
814 *Mol Biol.* 2004;39(1):1-19. doi:10.1080/10409230490440532
- 815 41. Round JL, Mazmanian SK. Inducible Foxp3+ regulatory T-cell development by a commensal  
816 bacterium of the intestinal microbiota. *Proc Natl Acad Sci U S A.* 2010;107(27):12204-12209.  
817 doi:10.1073/PNAS.0909122107
- 818 42. Erturk-Hasdemir D, Oh SF, Okan NA, et al. Symbionts exploit complex signaling to educate the  
819 immune system. *Proc Natl Acad Sci U S A.* 2019;116(52):26157-26166.  
820 doi:10.1073/PNAS.1915978116



- 821 43. Johnson JL, Jones MB, Cobb BA. Polysaccharide-experienced effector T cells induce IL-10 in  
822 FoxP3+ regulatory T cells to prevent pulmonary inflammation. *Glycobiology*. 2018;28(1):50-  
823 58. doi:10.1093/GLYCOB/CWX093
- 824 44. Telesford KM, Yan W, Ochoa-Reparaz J, et al. A commensal symbiotic factor derived from  
825 *Bacteroides fragilis* promotes human CD39(+)Foxp3(+) T cells and Treg function. *Gut*  
826 *Microbes*. 2015;6(4):234-242. doi:10.1080/19490976.2015.1056973
- 827 45. Pedersen TK, Brown EM, Plichta DR, et al. The CD4+ T cell response to a commensal-derived  
828 epitope transitions from a tolerant to an inflammatory state in Crohn's disease. *Immunity*.  
829 2022;55(10):1909-1923.e6. doi:10.1016/J.IMMUNI.2022.08.016
- 830 46. Blandford LE, Johnston EL, Sanderson JD, Wade WG, Lax AJ. Promoter orientation of the  
831 immunomodulatory *Bacteroides fragilis* capsular polysaccharide A (PSA) is off in individuals  
832 with inflammatory bowel disease (IBD). *Gut Microbes*. Published online February 7, 2019:1-9.  
833 doi:10.1080/19490976.2018.1560755
- 834 47. Lloyd-Price J, Arze, C Ananthakrishnan, AN Schirmer M, Avila-Pacheco J, Poon T, Andrews, E  
835 Ajami N, Bonham, KS Brislawn C. Multi-omics of the gut microbial ecosystem in inflammatory  
836 bowel diseases. *Nature*. 2019;569(7758):655–662. Accessed March 18, 2021.  
837 <https://www.nature.com/articles/s41586-019-1237-9>
- 838 48. Federici S, Kredo-Russo S, Valdés-Mas R, et al. Targeted suppression of human IBD-associated  
839 gut microbiota commensals by phage consortia for treatment of intestinal inflammation. *Cell*.  
840 2022;185(16):2879-2898.e24. doi:10.1016/J.CELL.2022.07.003
- 841 49. Norman JM, Handley SA, Baldridge MT, et al. Disease-specific alterations in the enteric  
842 virome in inflammatory bowel disease. *Cell*. 2015;160(3):447-460.  
843 doi:10.1016/J.CELL.2015.01.002
- 844 50. Duerkop BA, Kleiner M, Paez-Espino D, et al. Murine colitis reveals a disease-associated  
845 bacteriophage community. *Nat Microbiol*. 2018;3(9):1023-1031. doi:10.1038/s41564-018-  
846 0210-y
- 847 51. Wallace KL, Zheng LB, Kanazawa Y, Shih DQ. Immunopathology of inflammatory bowel  
848 disease. *World Journal of Gastroenterology : WJG*. 2014;20(1):6. doi:10.3748/WJG.V20.I1.6
- 849 52. Nugent SG, Kumar D, Rampton DS, Evans DF. Intestinal luminal pH in inflammatory bowel  
850 disease: possible determinants and implications for therapy with aminosaliculates and other  
851 drugs. *Gut*. 2001;48(4):571-577. doi:10.1136/GUT.48.4.571
- 852 53. Vertzoni M, Koulouri C, Poulou A, Goumas K, Reppas C. Exploring the impact of Crohn's  
853 disease on the intragastric environment of fasted adults. *ADMET DMPK*. 2020;8(2):122.  
854 doi:10.5599/ADMET.846
- 855 54. Barkas F, Liberopoulos E, Kei A, Elisaf M. Electrolyte and acid-base disorders in inflammatory  
856 bowel disease. *Annals of Gastroenterology : Quarterly Publication of the Hellenic Society of*  
857 *Gastroenterology*. 2013;26(1):23. Accessed February 11, 2023. /pmc/articles/PMC3959504/
- 858 55. Tian T, Wang Z, Zhang J. Pathomechanisms of Oxidative Stress in Inflammatory Bowel Disease  
859 and Potential Antioxidant Therapies. *Oxid Med Cell Longev*. 2017;2017.  
860 doi:10.1155/2017/4535194

- 861 56. Bourgonje AR, Feelisch M, Faber KN, Pasch A, Dijkstra G, van Goor H. Oxidative Stress and  
862 Redox-Modulating Therapeutics in Inflammatory Bowel Disease. *Trends Mol Med*.  
863 2020;26(11):1034-1046. doi:10.1016/J.MOLMED.2020.06.006
- 864 57. Tropini C, Moss EL, Merrill BD, et al. Transient osmotic perturbation causes long-term  
865 alteration to the gut microbiota. *Cell*. 2018;173(7):1742. doi:10.1016/J.CELL.2018.05.008
- 866 58. Milman O, Yelin I, Kishony R. Systematic identification of gene-altering programmed  
867 inversions across the bacterial domain. *Nucleic Acids Res*. 2023;51(2):553-573.  
868 doi:10.1093/NAR/GKAC1166
- 869 59. Blanco-Míguez A, Beghini F, Cumbo F, et al. Extending and improving metagenomic  
870 taxonomic profiling with uncharacterized species using MetaPhlAn 4. *Nature Biotechnology*  
871 2023. Published online February 23, 2023:1-12. doi:10.1038/s41587-023-01688-w
- 872 60. Langmead B, Salzberg SL. Fast gapped-read alignment with Bowtie 2. *Nat Methods*.  
873 2012;9(4):357. doi:10.1038/NMETH.1923
- 874 61. Dhariwal A, Chong J, Habib S, King IL, Agellon LB, Xia J. MicrobiomeAnalyst: A web-based tool  
875 for comprehensive statistical, visual and meta-analysis of microbiome data. *Nucleic Acids Res*.  
876 2017;45(W1):W180-W188. doi:10.1093/nar/gkx295
- 877 62. McMurdie PJ, Holmes S. phyloseq: An R Package for Reproducible Interactive Analysis and  
878 Graphics of Microbiome Census Data. *PLoS One*. 2013;8(4):e61217.  
879 doi:10.1371/JOURNAL.PONE.0061217
- 880 63. Simpson GL. *The Vegan Package*.; 2009. Accessed December 29, 2020. [http://cran.r-](http://cran.r-project.org/)  
881 [project.org/](http://cran.r-project.org/),
- 882 64. Love MI, Huber W, Anders S. Moderated estimation of fold change and dispersion for RNA-  
883 seq data with DESeq2. *Genome Biol*. 2014;15(12). doi:10.1186/s13059-014-0550-8
- 884 65. Wickham H. ggplot2: Elegant Graphics for Data Analysis. *Springer-Verlag New York*. Published  
885 online 2016.
- 886 66. Chaumeil PA, Mussig AJ, Hugenholtz P, Parks DH. GTDB-Tk v2: memory friendly classification  
887 with the genome taxonomy database. *Bioinformatics*. 2022;38(23):5315-5316.  
888 doi:10.1093/BIOINFORMATICS/BTAC672
- 889 67. Adams MH. Bacteriophages. *Bacteriophages*. Published online 1959.
- 890 68. García-Aljaro C, Muniesa M, Jofre J. Isolation of Bacteriophages of the Anaerobic Bacteria  
891 Bacteroides. *Methods Mol Biol*. 2018;1693:11-22. doi:10.1007/978-1-4939-7395-8\_2
- 892 69. Yu G. Using ggtree to Visualize Data on Tree-Like Structures. *Curr Protoc Bioinformatics*.  
893 2020;69(1):e96. doi:10.1002/CPBI.96
- 894 70. Eccles DA. Preparing Reads for Stranded Mapping. Published 2022. Accessed February 11,  
895 2023. [https://www.protocols.io/view/preparing-reads-for-stranded-mapping-](https://www.protocols.io/view/preparing-reads-for-stranded-mapping-5qpvon2zzl4o/v7)  
896 [5qpvon2zzl4o/v7](https://www.protocols.io/view/preparing-reads-for-stranded-mapping-5qpvon2zzl4o/v7)
- 897 71. Frith MC, Hamada M, Horton P. Parameters for accurate genome alignment. *BMC*  
898 *Bioinformatics*. 2010;11(1):1-14. doi:10.1186/1471-2105-11-80/FIGURES/7

- 899 72. Bolger AM, Lohse M, Usadel B. Trimmomatic: a flexible trimmer for Illumina sequence data.  
900 *Bioinformatics*. 2014;30(15):2114-2120. doi:10.1093/BIOINFORMATICS/BTU170
- 901 73. Li H. Minimap2: pairwise alignment for nucleotide sequences. *Bioinformatics*.  
902 2018;34(18):3094-3100. doi:10.1093/BIOINFORMATICS/BTY191
- 903 74. Li H, Handsaker B, Wysoker A, et al. The Sequence Alignment/Map format and SAMtools.  
904 *Bioinformatics*. 2009;25(16):2078-2079. doi:10.1093/BIOINFORMATICS/BTP352
- 905

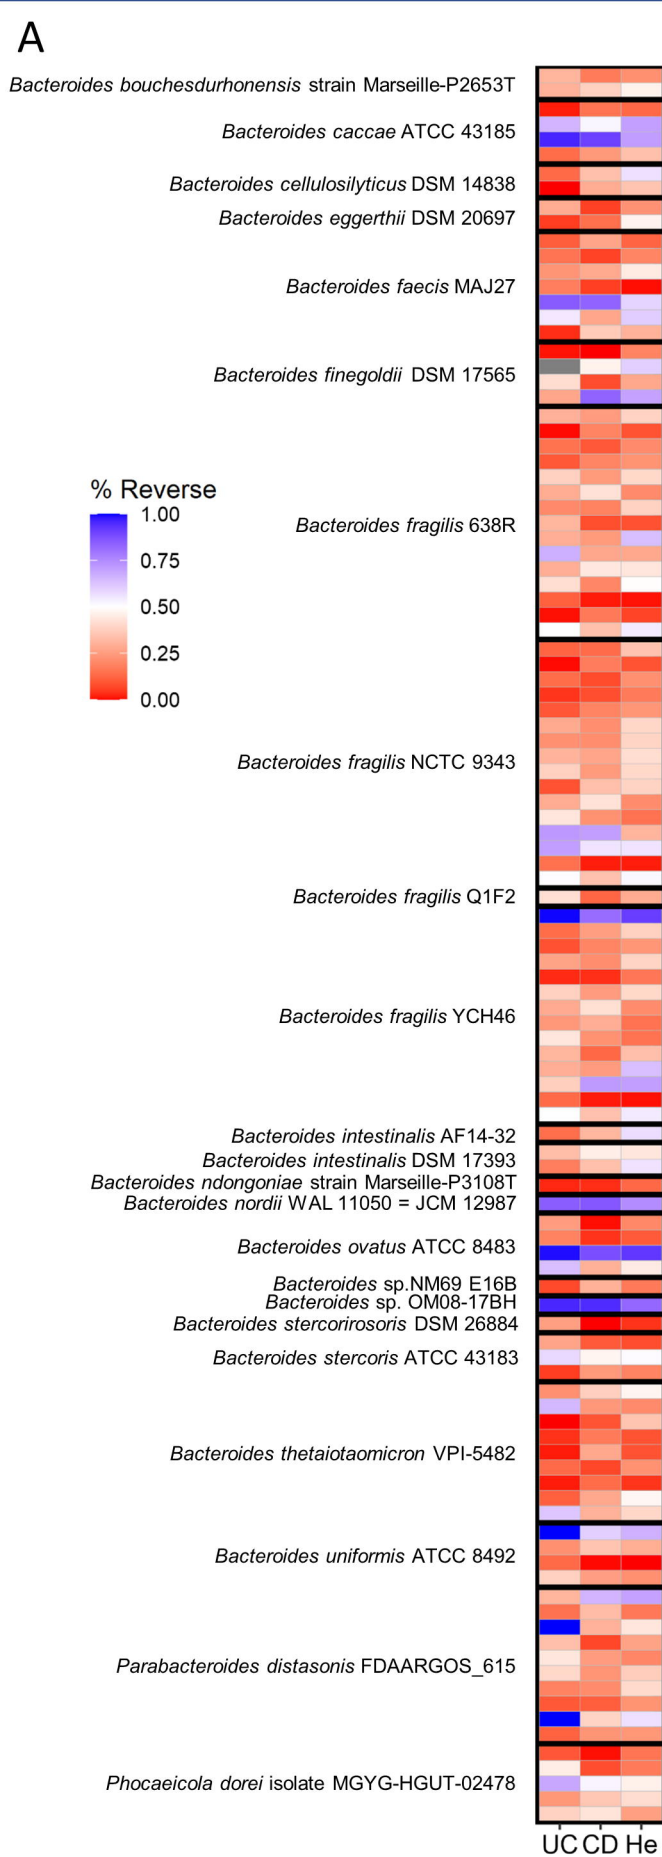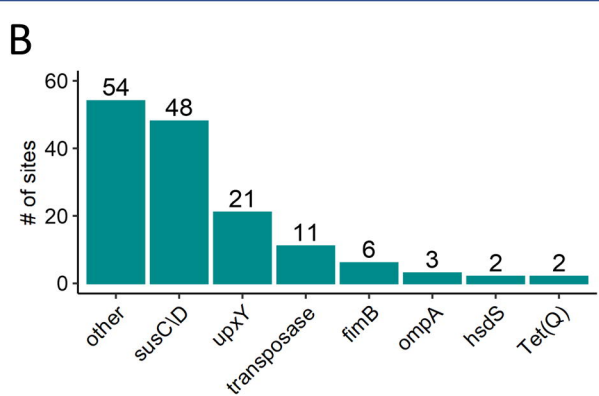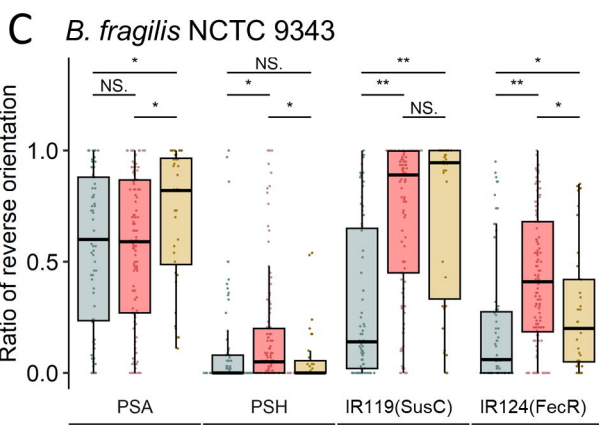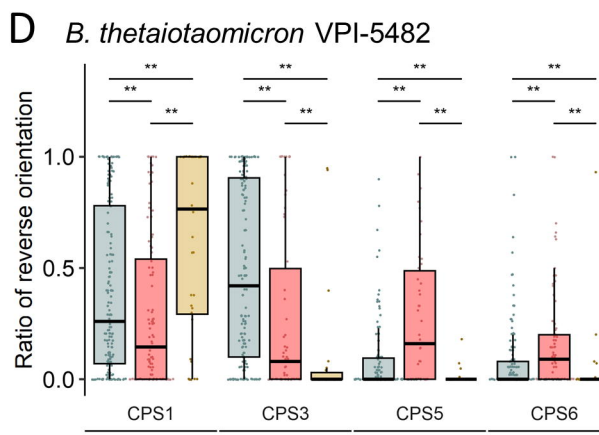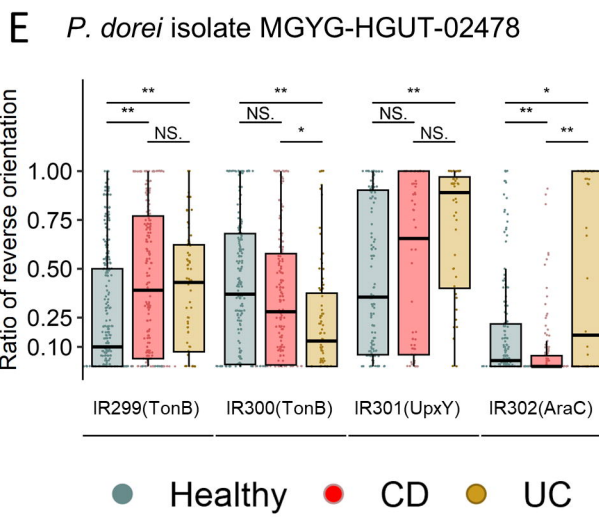

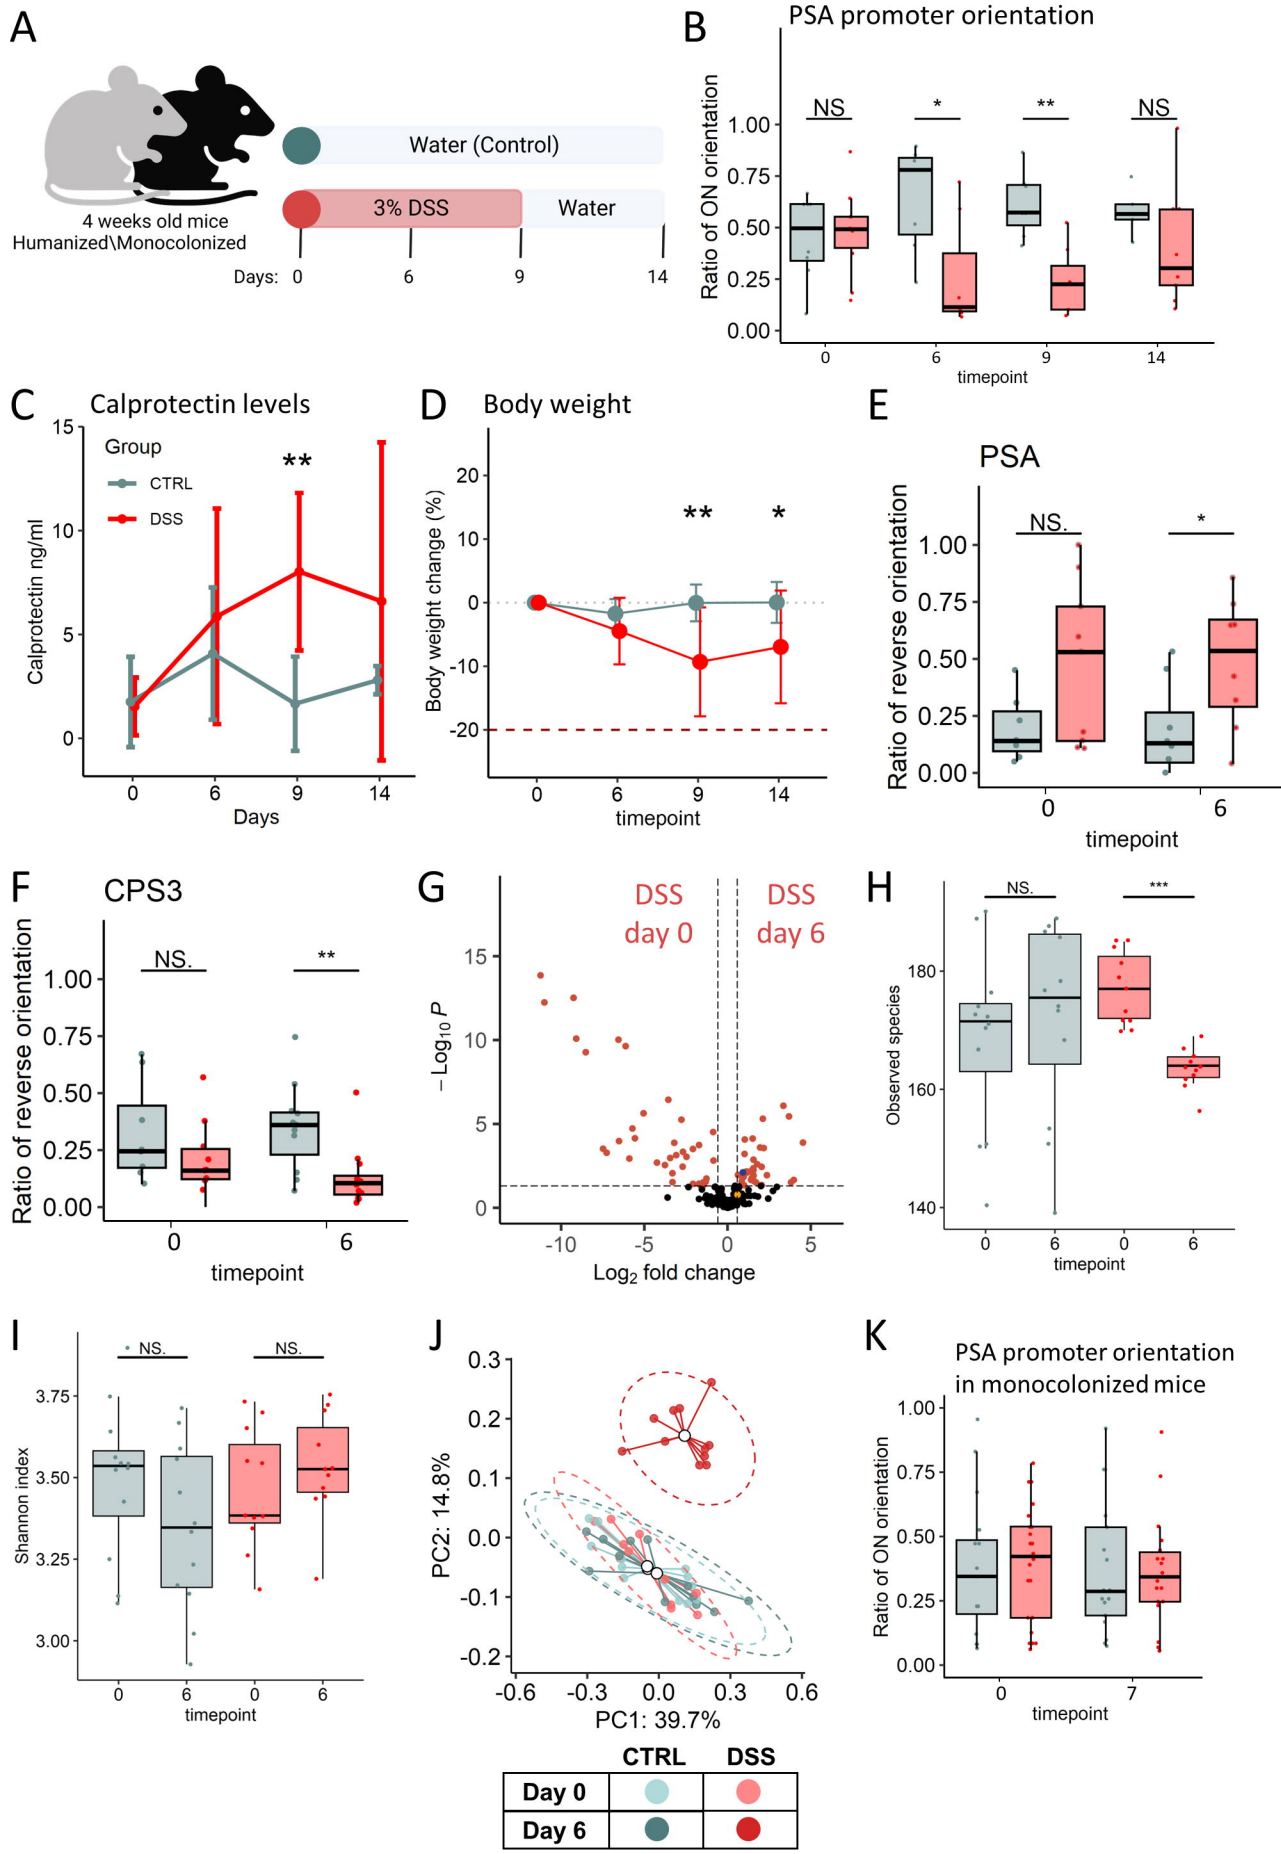

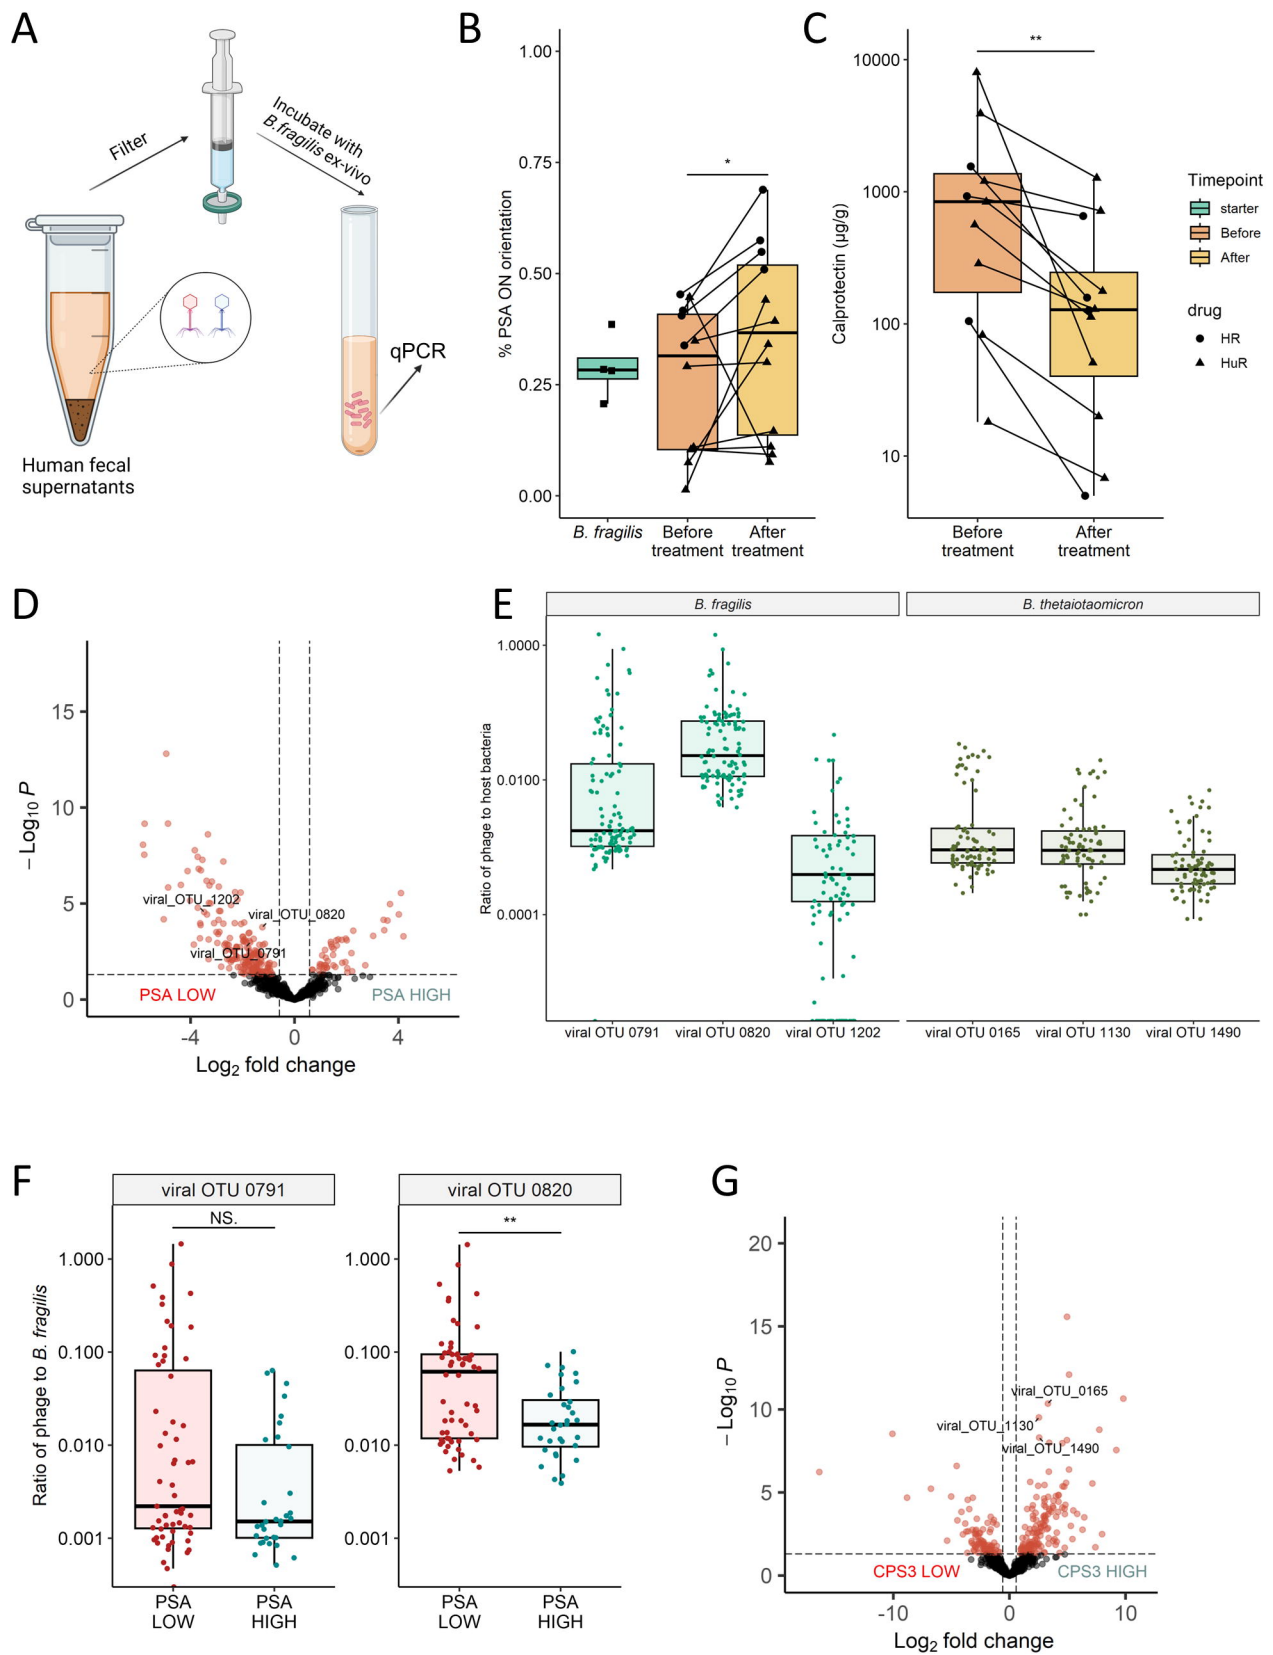

**A**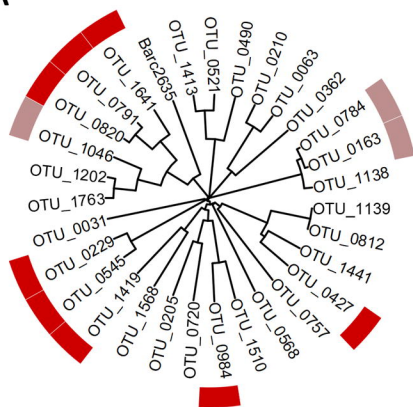

Differentially abundant in

- active CD
- active CD
- active UC

**B**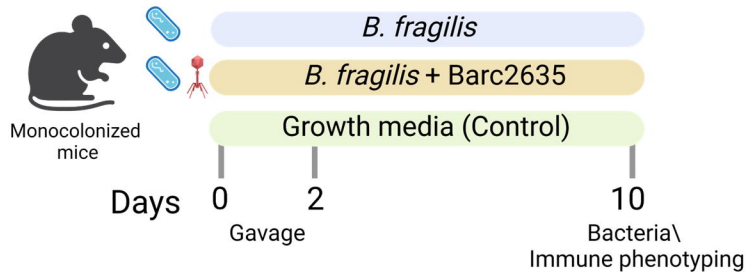**C**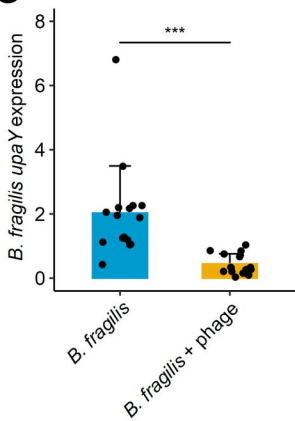**D**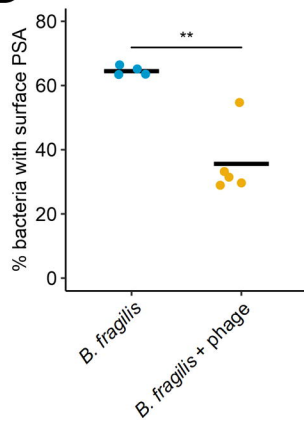**E**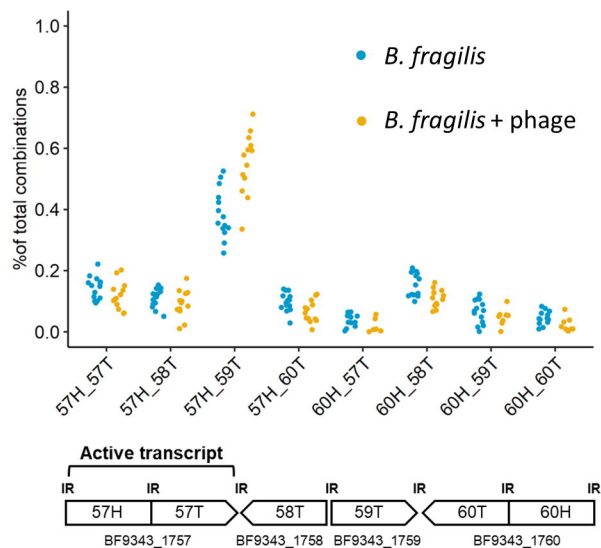**F**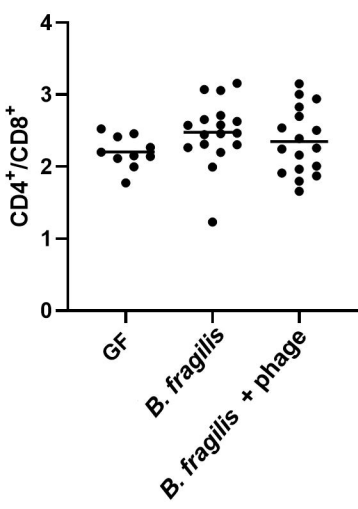**G**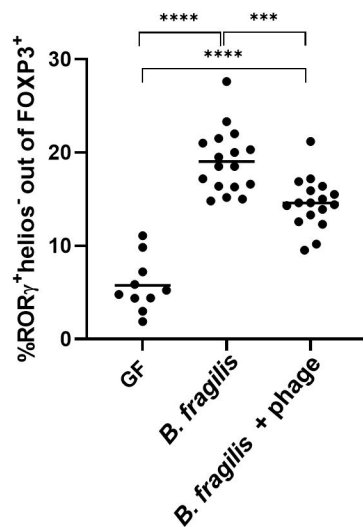

Source: https://www.biorxiv.org/content/10.1101/2023.03.31.535104v1.full.pdf
